# Supplementary material for: Real-world effectiveness evaluation of budesonide/formoterol Spiromax for the management of asthma and chronic obstructive pulmonary disease in the UK
Source: PubMed Central journal article supplement — BMJ Open. 2018 Oct 27;8(10):e022051. doi: 10.1136/bmjopen-2018-022051 (PMC6224753; doi:10.1136/bmjopen-2018-022051), 2018-10-27
Supplement: bmjopen-2018-022051.draft_revisions.pdf [file bmjopen-2018-022051.draft_revisions.pdf]

# BMJ Open

BMJ Open is committed to open peer review. As part of this commitment we make the peer review history of every article we publish publicly available.

When an article is published we post the peer reviewers' comments and the authors' responses online. We also post the versions of the paper that were used during peer review. These are the versions that the peer review comments apply to.

The versions of the paper that follow are the versions that were submitted during the peer review process. They are not the versions of record or the final published versions. They should not be cited or distributed as the published version of this manuscript.

BMJ Open is an open access journal and the full, final, typeset and author-corrected version of record of the manuscript is available on our site with no access controls, subscription charges or pay-per-view fees (<http://bmjopen.bmj.com>).

If you have any questions on BMJ Open's open peer review process please email [info.bmjopen@bmj.com](mailto:info.bmjopen@bmj.com)

# BMJ Open

## Real-world effectiveness evaluation of budesonide/formoterol Spiromax<sup>®</sup> for the management of asthma and chronic obstructive pulmonary disease in the United Kingdom

|                               |                                                                                                                                                                                                                                                                                                                                                                                                                                                                                                                                                                                                                                                                                                                                                                                                                                |
|-------------------------------|--------------------------------------------------------------------------------------------------------------------------------------------------------------------------------------------------------------------------------------------------------------------------------------------------------------------------------------------------------------------------------------------------------------------------------------------------------------------------------------------------------------------------------------------------------------------------------------------------------------------------------------------------------------------------------------------------------------------------------------------------------------------------------------------------------------------------------|
| Journal:                      | <i>BMJ Open</i>                                                                                                                                                                                                                                                                                                                                                                                                                                                                                                                                                                                                                                                                                                                                                                                                                |
| Manuscript ID                 | bmjopen-2018-022051                                                                                                                                                                                                                                                                                                                                                                                                                                                                                                                                                                                                                                                                                                                                                                                                            |
| Article Type:                 | Research                                                                                                                                                                                                                                                                                                                                                                                                                                                                                                                                                                                                                                                                                                                                                                                                                       |
| Date Submitted by the Author: | 02-Feb-2018                                                                                                                                                                                                                                                                                                                                                                                                                                                                                                                                                                                                                                                                                                                                                                                                                    |
| Complete List of Authors:     | Voorham, Jaco; Observational and Pragmatic Research Institute Pte Ltd, Roche, Nicolas; Hôpitaux Universitaires Paris Centre, Cochin Hospital (APHP), University Paris Descartes (EA2511)<br>Benhaddi, Hicham ; Teva Pharmaceuticals<br>van der Tol, Marianka ; Teva Pharmaceuticals Europe B.V.<br>Carter, Victoria ; Observational and Pragmatic Research Institute Pte Ltd<br>Van Boven, Job; University Medical Center Groningen, University of Groningen, Department of General Practice & Elderly Care<br>Bjermer, Leif; Skåne University Hospital, Respiratory Medicine and Allergology<br>Miravittles, Marc; Hospital General Universitari Vall d'Hebron, Barcelona, Spain, Pneumology<br>Price, David; Observational and Pragmatic Research Institute Pte Ltd; University of Aberdeen, Centre of Academic Primary Care |
| Keywords:                     | Asthma < THORACIC MEDICINE, budesonide/formoterol, chronic obstructive pulmonary disease, comparative effectiveness research, disease control, inhalation devices                                                                                                                                                                                                                                                                                                                                                                                                                                                                                                                                                                                                                                                              |
|                               |                                                                                                                                                                                                                                                                                                                                                                                                                                                                                                                                                                                                                                                                                                                                                                                                                                |

SCHOLARONE™  
Manuscripts

1 **Real-world effectiveness evaluation of budesonide/formoterol Spiromax<sup>®</sup> for the**  
2  
3 **management of asthma and chronic obstructive pulmonary disease in the United**  
4  
5 **Kingdom**  
6  
7  
8

9 **Running title:** Real-world effectiveness of BF Spiromax<sup>®</sup>  
10  
11  
12

13 **Authors:** Jaco Voorham<sup>1</sup>, Nicolas Roche<sup>2</sup>, Hicham Benhaddi<sup>3</sup>, Marianka van der Tol<sup>4</sup>, Victoria  
14 Carter<sup>1</sup>, Job F.M. van Boven<sup>5</sup>, Leif Bjermer<sup>6</sup>, Marc Miravittles<sup>7</sup>, David Price<sup>1,8</sup>  
15  
16

17 **Affiliations:**  
18

- 19 1. Observational and Pragmatic Research Institute Pte Ltd, Singapore
- 20 2. Hôpitaux Universitaires Paris Centre, Cochin Hospital (APHP), University Paris Descartes  
21 (EA2511), Paris, France
- 22 3. Teva Pharmaceuticals, Wilrijk, Belgium
- 23 4. Teva Pharmaceuticals Europe B.V., Amsterdam, The Netherlands
- 24 5. Department of General Practice & Elderly Care, Groningen Research Institute for Asthma and  
25 COPD (GRIAC), University Medical Centre Groningen, University of Groningen, Groningen, The  
26 Netherlands
- 27 6. Respiratory Medicine and Allergology, Skåne University Hospital, Lund, Sweden
- 28 7. Pneumology Department. Hospital Universitari Vall d'Hebron, CIBER de Enfermedades  
29 Respiratorias (CIBERES), Barcelona, Spain
- 30 8. Centre of Academic Primary Care, University of Aberdeen, Aberdeen, UK  
31  
32  
33  
34  
35  
36  
37  
38  
39  
40  
41  
42  
43  
44

45 **Corresponding author details:** Jaco Voorham

46  
47 Postal address: Observational and Pragmatic Research Institute Pte Ltd, Unit 33 & 60, Paya Lebar  
48 Rd, Singapore 409051

49  
50 Email: [jaco@opri.sg](mailto:jaco@opri.sg)

51  
52 Telephone: +351 214 055 027

53  
54  
55 Word count: 3650 words; 44 references; 2 tables; 3 figures; supplementary methods; 1  
56  
57 supplementary table  
58  
59

## ABSTRACT

**Objectives:** Budesonide/formoterol (BF) Spiromax<sup>®</sup> is an inhaled corticosteroid (ICS)/long-acting  $\beta_2$ -agonist (LABA) fixed-dose combination inhaler, designed to minimise common inhaler errors and provide reliable and consistent dose delivery in asthma and chronic obstructive pulmonary disease (COPD). We evaluated non-inferiority of BF Spiromax after changing from another FDC inhaler, compared with continuing the original inhaler.

**Methods:** Patients with asthma and/or COPD who switched to BF Spiromax were matched (1:3) with non-switchers. Data were from Optimum Patient Care Research Database and Clinical Practice Research Datalink in the United Kingdom (UK). Primary endpoint was proportion of patients achieving disease control (using Risk Domain Control [RDC] algorithm); secondary endpoints were: exacerbation rate, short-acting  $\beta_2$ -agonists (SABA) use, and treatment stability (achieved RDC; no maintenance treatment change). Non-inferiority was defined as having 95% confidence interval (CI) lower bound above  $-10\%$ , using conditional logistic regression and adjusted for relevant confounders.

**Results:** Comparing 385 matched patients (asthma 253; COPD 132) who switched to BF Spiromax with 1091 (asthma 743; COPD 348) non-switchers, non-inferiority of BF Spiromax in RDC was demonstrated (adjusted difference:  $+6.6\%$ ; 95% CI:  $-0.3-13.5$ ). Among asthma patients, switchers to BF Spiromax versus BF Turbuhaler reported fewer exacerbations (adjusted rate ratio [RR] 0.76; [95% CI 0.60-0.99];  $p=0.044$ ); were less likely to use high SABA daily doses (adjusted odds ratio [OR] 0.71; [95% CI 0.52-0.98];  $p=0.034$ ); used fewer SABA inhalers (adjusted RR 0.92; [95% CI 0.86-0.99];  $p=0.019$ ), and were more likely to achieve treatment stability (adjusted OR 1.44; [95% CI 1.02-2.04];  $p=0.037$ ). No significant differences in these endpoints were seen among COPD patients.

**Conclusions:** Among UK asthma and COPD patients, real-world use of BF Spiromax was non-inferior to BF Turbuhaler in terms of disease control. Among asthma patients, switching to BF Spiromax was associated with reduced exacerbations, reduced SABA use, and improved treatment stability versus continuing on BF Turbuhaler.

**Key words/terms (from MEDLINE MeSH):** asthma, budesonide/formoterol, chronic obstructive pulmonary disease, comparative effectiveness research, disease control, inhalation devices, observational study

## Strengths and limitations of this study

- Clearly defined *a priori* hypothesis, endpoints, and sample size.
- A non-selective patient population, obtained through the use of real-world data from validated databases of primary care patients, with sufficient follow-up period for observing relevant outcomes.
- Hospital admissions, A&E attendances, and outpatient visits are not systematically recorded in primary care databases, and the applied definition to identify asthma-related hospital admissions or A&E events may have given rise to false positive events.
- Potential effects of inhaler technique on the reported outcomes could not be taken into account, as this would require close observation and communication with each patient as they demonstrated their inhaler technique.
- Observed differences in secondary outcomes could have arisen as a consequence of factors unrelated to the inhalers that might not have been captured in the dataset.

## INTRODUCTION

Asthma and chronic obstructive pulmonary disease (COPD) are common respiratory conditions.[1, 2] Cornerstone asthma/COPD treatment consists of inhaled therapy with proven efficacy in randomised clinical trials (RCTs).[3, 4] In real life, however, incorrect inhaler use is common in patients with asthma or COPD, resulting in poor symptom control and worse outcomes.[5, 6] Specifically, critical inhaler errors were reported in a review of 3660 patients:[7] insufficient respiratory effort in dry-powder inhaler (DPI) users and actuation before inhalation in metered-dose inhaler users were found to be associated with uncontrolled asthma.[7]

DuoResp<sup>®</sup> Spiromax<sup>®</sup> (Teva Pharmaceutical Industries, Petach Tikva, Israel) is an inhaler containing a fixed-dose combination (FDC) of the inhaled corticosteroid (ICS) budesonide and the long-acting  $\beta_2$ -agonist (LABA) formoterol (budesonide/formoterol [BF]). The Spiromax<sup>®</sup> inhaler was designed to maximise ease of use, reliability of dosing, and consistency of lung deposition[8, 9] in patients with asthma or COPD. It is similar in design and appearance to a metered dose inhaler, but uses different internal configuration. The Spiromax<sup>®</sup> requires only one preparation step (opening the cap) and provides consistent dose delivery across a broad range of inspiratory flow rates.[8, 9] Recent findings suggest that Spiromax is associated with a reduced number of errors related to dose preparation, undertaking the steps needed to correctly deliver the dose during inhalation, and handling the device after inhalation, as well as being easier for patients and healthcare professionals to use compared with other DPIs.[10, 11] BF Spiromax has demonstrated pharmacokinetic bioequivalence to BF Turbuhaler<sup>®</sup> (AstraZeneca UK Limited, UK) in healthy volunteers.[12, 13] A recent independent study in COPD found BF Spiromax to have a faster onset of bronchodilation than BF Turbuhaler, likely due to differences in drug deposition between the two devices.[14] However, evidence for the real-world effectiveness of BF Spiromax in comparison with other inhalers in asthma and/or COPD patients is lacking.

The current study was part of a multi-phase assessment of real-world outcomes over 1 year in patients with asthma and/or COPD who switched to BF Spiromax compared with patients who remained on another device, using data from two United Kingdom (UK) primary care administrative

1 databases. The primary objective of this phase of the study was to evaluate the non-inferiority of  
2  
3 changing from another FDC inhaler to BF Spiromax versus continuing to use the original FDC  
4  
5 inhaler, in terms of achieving disease control, based on the Risk Domain Control (RDC) algorithm;  
6  
7 secondary objectives included the effects of the switch on the occurrence of moderate/severe  
8  
9 exacerbations and respiratory-related hospitalisations, treatment stability, and short-acting  $\beta_2$ -  
10  
11 agonist (SABA) use.  
12  
13  
14  
15

## 16 **METHODS**

### 17 **Patients and study design**

18  
19  
20  
21 This was a matched, historic cohort study of patients with asthma and/or COPD using two  
22  
23 validated primary care databases of patients in the UK, Optimum Patient Care Research Database  
24  
25 (OPCRD) and Clinical Practice Research Datalink (CPRD).[15, 16] The OPCRD is governed by  
26  
27 The Anonymous Data Ethics Protocols and Transparency committee, commissioned by the  
28  
29 Respiratory Effectiveness Group.[17] The CPRD is a UK government research service, jointly  
30  
31 supported by the National Institute for Health Research and the Medicines and Healthcare  
32  
33 Products Regulatory Agency, that provides access to anonymised NHS data. It operates under a  
34  
35 range of UK and European Laws as well as NHS and other guidelines.[16] This study is registered  
36  
37 with the European Network of Centres for Pharmacoepidemiology and Pharmacovigilance  
38  
39 (Register Number EUPAS13238).[18]  
40  
41  
42

43 The OPCRD and CPRD databases were searched onwards from 2010 to identify prescriptions of  
44  
45 BF Spiromax, BF Turbuhaler, and fluticasone propionate/salmeterol (FS) Accuhaler®/Diskus®  
46  
47 (GlaxoSmithKline, Uxbridge, UK) in patients  $\geq 18$  years of age with asthma and/or COPD (Figure  
48  
49 1). The OPCRD and CPRD datasets for this study were constructed separately and checked for  
50  
51 overlap before pooling to exclude duplicate patients. Patients had to have at least 2 years of data,  
52  
53 comprising a minimum of 1 baseline year and a 1-year outcome period. Patients were required to  
54  
55 have at least three prescriptions for ICS/LABA FDC (BF Spiromax, BF Turbuhaler, or FS  
56  
57 Accuhaler/Diskus) therapy during the baseline period. Switch patients must have evidence of an  
58  
59  
60

1 initial BF Spiromax prescription in the outcome period as well as at least one supplementary  
2 prescription for BF Spiromax in the 1-year outcome period to ensure consistent usage. Likewise,  
3 patients remaining on their inhaler required at least one repeat prescription in the outcome period.  
4  
5 In addition, to minimise the probability of patients included in the study having been switched to BF  
6 Spiromax for clinical reasons, BF Spiromax patients must have been registered at practices  
7 considered to have a policy of BF Spiromax adoption or wholesale change, identified as practices  
8 at which  $\geq 5$  patients change to BF Spiromax within a 3-month period. The current study includes  
9 only patients who stayed on BF Turbuhaler or switched from BF Turbuhaler to BF Spiromax, due to  
10 the low number of patients who switched from FS Accuhaler/Diskus to BF Spiromax. The date of  
11 the first prescription of BF Spiromax or the (matched) date of the repeat prescription for BF  
12 Turbuhaler in the control arm was the index date.  
13  
14  
15  
16  
17  
18  
19  
20  
21  
22  
23  
24

25 Asthma patients were required to have a diagnostic code (Read code)[19] for asthma and/or at  
26 least two prescriptions for asthma therapy during the baseline year, and to have no other chronic  
27 respiratory disease diagnosis. COPD patients were required to be  $\geq 40$  years of age at first  
28 prescription for BF Spiromax or the matching BF Turbuhaler prescription, and to have a diagnostic  
29 code for COPD and a post-bronchodilator  $FEV_1/FVC < 0.70$  consistent with the criteria for inclusion  
30 in the UK register of patients with COPD (Quality and Outcomes Framework). The subgroup of  
31 patients with only an asthma diagnosis is referred to henceforth as the asthma group. The patients  
32 with a COPD diagnosis (with or without an asthma diagnosis) are referred to henceforth as the  
33 COPD group.  
34  
35  
36  
37  
38  
39  
40  
41  
42  
43  
44

### 45 **Outcome measures**

46  
47 The primary outcome was disease control as assessed by RDC, a composite measure that has  
48 been used in several similar matched historical cohort studies to define absence of  
49 exacerbations.[20-23] To achieve RDC in this study, patients must not have an asthma/COPD-  
50 related hospital admission, asthma/COPD-related Accident and Emergency (A&E) attendance, or  
51 course of oral corticosteroids (OCS) during the outcome period. In addition, patients in the COPD  
52 group must not have received antibiotics for a lower respiratory tract infection (LRTI).  
53  
54  
55  
56  
57  
58  
59



1  
2  
3 Secondary outcomes included the number of moderate/severe exacerbations and hospitalisations,  
4 and change in treatment stability. A moderate/severe exacerbation (for COPD) or severe  
5 exacerbation (for asthma) was defined following the American Thoracic Society/European  
6 Respiratory Society Task Force Position Statement.[24] Lower respiratory hospitalisations were  
7 identified and classified as follows: definite hospitalisations were those with a lower respiratory  
8 code, including asthma and LRTI codes; OR a generic hospitalisation Read code that has been  
9 recorded on the same day as a lower respiratory consultation; definite + probable hospitalisations  
10 were those occurring within a 7-day window (either side of the hospitalisation date) of a lower  
11 respiratory Read code. Adequate treatment stability was defined as achieving RDC and no  
12 increase in dose, change in delivery device, and change in type of ICS and/or use of LABAs,  
13 theophylline, long-acting muscarinic antagonists, or leukotriene receptor antagonists (LTRAs).[22]  
14 Additional outcomes were SABA usage, which was expressed as average daily SABA dosage  
15 during the outcome year and calculated from prescriptions as (*Count of inhalers x doses in pack x*  
16 *µg strength*) / 365), and a pneumonia event which was defined as having a Read coded diagnosis  
17 (probable pneumonia), or a Read coded diagnosis with a hospital admission or chest x-ray within 1  
18 month (definite pneumonia).  
19  
20  
21  
22  
23  
24  
25  
26  
27  
28  
29  
30  
31  
32  
33  
34  
35  
36

### 37 **Statistical analyses**

38  
39 It was estimated that 349 patients would have 90% power to demonstrate non-inferiority of BF  
40 Spiromax and BF Turbuhaler for achieving RDC, at a one-sided significance level of 0.050. For the  
41 calculation, an expected difference in proportions of zero was used, assuming that the proportion  
42 of discordant pairs was 0.458. This assumption was based on previous studies showing that a  
43 weighted average of 71.6% of asthma and COPD patients prescribed FDC therapy have no  
44 exacerbations over a one-year period.[25, 26]  
45  
46  
47  
48  
49  
50

51 Descriptive statistics of all baseline demographic characteristics, co-morbidities, medication use,  
52 indicators of disease severity and other patient characteristics were computed separately for the  
53 patients in the BF Spiromax and BF Turbuhaler groups and for patients in the asthma and COPD  
54 groups. In cases where multiple observations existed for a patient, one was randomly selected.  
55  
56  
57  
58  
59

1 Continuous variables were summarised using the number of non-missing observations, percentage  
2 of non-missing observations, mean, standard deviation (SD), median and interquartile range  
3 (difference between the 25th and 75th percentile), and a P-value for the Kruskal-Wallis equality-of-  
4 populations rank test. Binary and categorical variables were summarised using the percentage of  
5 non-missing observations, the frequency and percentages (based on the non-missing sample size)  
6 of observed levels, and a P-value for the Pearson's chi-square test of independent categories.  
7  
8  
9  
10  
11  
12  
13  
14

15 Patients switched to BF Spiromax were compared with matched controls who stayed on BF  
16 Turbuhaler. Mixed matching was performed 1:3 so that each BF Spiromax patient would be  
17 matched with up to three patients who remained on BF Turbuhaler (see Supplementary methods in  
18 Appendix for a full description of the mixed matching process). Mixed matching was performed to  
19 increase precision of the effect estimates. Because the analyses were conducted on all of the  
20 matched patients, which could introduce residual confounding due to imbalanced matching ratios,  
21 a sensitivity analysis was performed in which the outcome analyses were also performed in the  
22 subpopulation of patients in the BF Spiromax arm with exactly three matched patients in the BF  
23 Turbuhaler arm. Matching was performed using the most relevant confounders which were  
24 identified based on baseline imbalance and bias potential in relation to the primary outcome. For  
25 asthma, these confounders included age, gender, number of antibiotic courses, number of OCS  
26 courses, Global Initiative for Asthma (GINA) control categories, number of exacerbations, and  
27 RDC; matching confounders for COPD included age, gender, drug therapy, ICS average daily  
28 dose, number of antibiotic courses, number of exacerbations, and Global Initiative for Chronic  
29 Obstructive Lung Disease (GOLD) risk categories. Baseline imbalance was assessed using the  
30 Standardised Mean Difference (SMD), which, unlike a P-value, is not affected by the number of  
31 observations in a sample,[27, 28] and provides information on the size of the difference. An SMD  
32 of  $\leq 10\%$  was assumed to represent sufficient balance between the arms,[29] and the formula used  
33 is presented in the Supplementary methods of the Appendix. Bias potential is the degree to which  
34 the observed association between the exposures of interest and the outcome is affected by  
35 conditioning on another variable; the formula is presented in the Supplementary methods of the  
36 Appendix. A sensitive bias potential cut off of  $\geq 2\%$  was used for this study.  
37  
38  
39  
40  
41  
42  
43  
44  
45  
46  
47  
48  
49  
50  
51  
52  
53  
54  
55  
56  
57  
58  
59  
60

1  
2  
3 Baseline variables with highest bias potential that were also insufficiently balanced were presented  
4  
5 to a panel of experts for final selection. Following matching, the process was repeated in the  
6  
7 matched sample to identify any residual confounding.  
8  
9

10  
11 After mixed matching, conditional logistic regression of the between-patient difference in the  
12  
13 primary outcome was performed to provide a 95% confidence interval (CI) with which to assess  
14  
15 non-inferiority. Analyses were undertaken for the patients in the asthma and COPD groups  
16  
17 combined, as well as by disease group. The model was adjusted for baseline variables that  
18  
19 remained with bias potential after matching. Non-inferiority was claimed if the lower bound of the  
20  
21 95% CI for the primary endpoint (RDC) was above -10%, a difference widely regarded as clinically  
22  
23 important for many outcomes in respiratory studies,[30,31] and used previously in similar  
24  
25 studies.[22, 23] If non-inferiority was achieved, superiority was tested.  
26  
27  
28

29  
30 Secondary outcomes were analysed in the matched sample and adjusted for baseline variables  
31  
32 that remained with bias potential after matching, and reported as conditional rate ratios (RR) or  
33  
34 odds ratios (OR) with their 95% CIs. Number of exacerbations and hospitalisations were analysed  
35  
36 in the matched sample using conditional Poisson regression to obtain estimates of relative rates,  
37  
38 treatment stability was analysed in the matched sample using conditional logistic regression, and  
39  
40 SABA usage was analysed in the matched sample using conditional ordinal logistic regression,  
41  
42 after the SABA average daily dose was categorised.  
43  
44

45  
46 All statistical analyses were conducted using Stata MP6 version 12 and Stata SE version 14  
47  
48 (StataCorp, College Station, TX). A statistically significant result was defined as  $p < 0.05$ .  
49  
50  
51

## 52 **RESULTS**

### 53 **Study population**

54  
55  
56  
57 Overall, 420 patients switched to BF Spiromax (Figure 1). Of the patients who used BF Turbuhaler,  
58  
59  
60

1 410 switched to BF Spiromax and 49,386 remained on BF Turbuhaler. Baseline characteristics of  
2 these unmatched patients are shown in Supplementary Table 1, where imbalanced covariates  
3 (SMD >10%) for asthma include mean age, drug therapy, ICS average daily dose, and number of  
4 exacerbations in baseline years; those for COPD include smoking status, drug therapy, and ICS  
5 average daily dose.  
6  
7  
8  
9

10  
11  
12 For the matched analysis, a total of 385 patients switching to BF Spiromax were analysed; a total  
13 of 1091 patients who stayed on BF Turbuhaler were matched to the switch patients (**Figure 1**).  
14  
15 Twenty five patients who switched back to BF Turbuhaler or to another FDC ICS/LABA were not  
16 included in the analysis. In the baseline characteristics of the matched patients, covariates with  
17 SMD >10% in the asthma group were body mass index and ischaemic heart disease; for COPD  
18 they were smoking status, ischaemic heart disease, heart failure, number of exacerbations, and  
19 number of acute OCS courses (**Table 1**).  
20  
21  
22  
23  
24  
25  
26  
27  
28  
29  
30  
31  
32  
33  
34  
35  
36  
37  
38  
39  
40  
41  
42  
43  
44  
45  
46  
47  
48  
49  
50  
51  
52  
53  
54  
55  
56  
57  
58  
59  
60

**Table 1. Patient characteristics in matched analysis**

| Variable                                                     | Asthma patients        |                          |             |            | COPD patients          |                          |             |            |
|--------------------------------------------------------------|------------------------|--------------------------|-------------|------------|------------------------|--------------------------|-------------|------------|
|                                                              | BF Spiromax<br>(n=253) | BF Turbuhaler<br>(n=743) | P-<br>value | SMD<br>(%) | BF Spiromax<br>(n=132) | BF Turbuhaler<br>(n=348) | P-<br>value | SMD<br>(%) |
| <b>Mean (SD) age, years</b>                                  | 55.9 (15.3)            | 55.8 (15.1)              | 0.9101      | 0.7        | 70.5 (8.8)             | 70.5 (8.5)               | 0.9512      | 0.2        |
| <b>Males, n (%)</b>                                          | 112 (44.3)             | 331 (44.5)               | 0.9382      | 0.6        | 66 (50.0)              | 184 (52.9)               | 0.5736      | 5.7        |
| <b>Body mass index*, n (%)</b>                               |                        |                          | 0.4038      | 12.1       |                        |                          |             |            |
| <18.5 kg/m <sup>2</sup>                                      | 3 (1.3)                | 9 (1.2)                  |             |            | 6 (4.7)                | 11 (3.2)                 | 0.6977      | 7.4        |
| 18.5 to <25 kg/m <sup>2</sup>                                | 65 (27.2)              | 163 (22.5)               |             |            | 46 (35.7)              | 112 (32.4)               |             |            |
| 25 to <30 kg/m <sup>2</sup>                                  | 88 (36.8)              | 265 (36.5)               |             |            | 39 (30.2)              | 120 (34.7)               |             |            |
| >30 kg/m <sup>2</sup>                                        | 83 (34.7)              | 289 (39.8)               |             |            | 38 (29.5)              | 103 (29.8)               |             |            |
| <b>Smoking status<sup>†</sup>, n (%)</b>                     |                        |                          | 0.7393      | 5.2        |                        |                          | 0.5696      | 10.8       |
| Non-smoker                                                   | 126 (50.8)             | 397 (53.6)               |             |            | 14 (10.6)              | 48 (13.9)                |             |            |
| Current smoker                                               | 44 (17.7)              | 123 (16.6)               |             |            | 36 (27.3)              | 98 (28.3)                |             |            |
| Ex-smoker                                                    | 78 (31.5)              | 220 (29.7)               |             |            | 82 (62.1)              | 200 (57.8)               |             |            |
| <b>Cardiovascular disease, n (%)</b>                         |                        |                          |             |            |                        |                          |             |            |
| Ischaemic heart disease                                      | 13 (5.1)               | 62 (8.3)                 | 0.0951      | 12.8       | 22 (16.7)              | 78 (22.4)                | 0.1662      | 14.5       |
| Heart failure                                                | 1 (0.4)                | 8 (1.1)                  | 0.3225      | 8.0        | 4 (3.0)                | 23 (6.6)                 | 0.1286      | 16.7       |
| <b>Exacerbations, n (%)</b>                                  |                        |                          | 0.9869      | 3.6        |                        |                          | 0.7809      | 12.9       |
| 0                                                            | 199 (78.7)             | 593 (79.8)               |             |            | 54 (40.9)              | 156 (44.8)               |             |            |
| 1                                                            | 42 (16.6)              | 120 (16.2)               |             |            | 38 (28.8)              | 106 (30.5)               |             |            |
| 2                                                            | 7 (2.8)                | 18 (2.4)                 |             |            | 15 (11.4)              | 35 (10.1)                |             |            |
| 3                                                            | 4 (1.6)                | 9 (1.2)                  |             |            | 13 (9.8)               | 28 (8.0)                 |             |            |
| ≥4                                                           | 1 (0.4)                | 3 (0.4)                  |             |            | 12 (9.1)               | 23 (6.6)                 |             |            |
| <b>No. of respiratory-related hospital admissions, n (%)</b> |                        |                          | 1.0000      | 0          |                        |                          | 0.1460      | 2.8        |
| 0                                                            | 253 (100.0)            | 743 (100.0)              |             |            | 129 (97.7)             | 338 (97.1)               |             |            |
| 1                                                            | 0                      | 0                        |             |            | 1 (0.8)                | 9 (2.6)                  |             |            |
| ≥2                                                           | 0                      | 0                        |             |            | 2 (1.5)                | 1 (0.3)                  |             |            |
| <b>Uncontrolled risk domain control, n (%)</b>               | 70 (27.7)              | 194 (26.1)               | 0.6278      | 3.5        | 78 (59.1)              | 192 (55.2)               | 0.4397      | 7.9        |
| <b>No. of antibiotic courses, n (%)</b>                      |                        |                          |             |            |                        |                          |             |            |
| 0                                                            | 212 (83.8)             | 630 (84.8)               | 0.8362      | 5.5        | 74 (56.1)              | 198 (56.9)               | 0.9478      | 6.4        |
| 1                                                            | 34 (13.4)              | 99 (13.3)                |             |            | 37 (28.0)              | 104 (29.9)               |             |            |

| Variable                               | Asthma patients        |                          |             |            | COPD patients          |                          |             |            |
|----------------------------------------|------------------------|--------------------------|-------------|------------|------------------------|--------------------------|-------------|------------|
|                                        | BF Spiromax<br>(n=253) | BF Turbuhaler<br>(n=743) | P-<br>value | SMD<br>(%) | BF Spiromax<br>(n=132) | BF Turbuhaler<br>(n=348) | P-<br>value | SMD<br>(%) |
| 2                                      | 5 (2.0)                | 12 (1.6)                 |             |            | 11 (8.3)               | 26 (7.5)                 |             |            |
| 3                                      | 1 (0.4)                | 1 (0.1)                  |             |            | 4 (3.0)                | 8 (2.3)                  |             |            |
| ≥4                                     | 1 (0.4)                | 1 (0.1)                  |             |            | 6 (4.5)                | 12 (3.4)                 |             |            |
| <b>No. of acute OCS courses, n (%)</b> |                        |                          |             |            |                        |                          |             |            |
| 0                                      | 199 (78.7)             | 593 (79.8)               |             |            | 79 (59.8)              | 225 (64.7)               |             |            |
| 1                                      | 42 (16.6)              | 120 (16.2)               | 0.9869      | 3.6        | 28 (21.2)              | 74 (21.3)                | 0.6813      | 14.4       |
| 2                                      | 7 (2.8)                | 18 (2.4)                 |             |            | 9 (6.8)                | 20 (5.7)                 |             |            |
| 3                                      | 4 (1.6)                | 9 (1.2)                  |             |            | 7 (5.3)                | 15 (4.3)                 |             |            |
| ≥4                                     | 1 (0.4)                | 3 (0.4)                  |             |            | 9 (6.8)                | 14 (4.0)                 |             |            |
| <b>Average daily SABA dose, n (%)</b>  |                        |                          |             |            |                        |                          |             |            |
| 0                                      | 64 (25.3)              | 224 (30.1)               |             |            | 23 (17.4)              | 65 (18.7)                |             |            |
| >0 to ≤200 µg/day                      | 70 (27.7)              | 196 (26.4)               | 0.4055      | 4.9        | 22 (16.7)              | 66 (19.0)                | 0.3524      | 8.4        |
| >200 to ≤400 µg/day                    | 56 (22.1)              | 139 (18.7)               |             |            | 32 (24.2)              | 78 (22.4)                |             |            |
| >400 to ≤600 µg/day                    | 25 (9.9)               | 59 (7.9)                 |             |            | 5 (3.8)                | 29 (8.3)                 |             |            |
| >600 µg/day                            | 38 (15.0)              | 125 (16.8)               |             |            | 50 (37.9)              | 110 (31.6)               |             |            |

BF: Budesonide/formoterol; OCS: oral corticosteroids; SABA: short-acting  $\beta_2$ -agonist; SMD: standardised mean difference

\*Some missing data for this parameter: n=239 for asthma on BF Spiromax, n=726 for asthma on BF Turbuhaler; n=129 for COPD on BF Spiromax, n=346 for COPD on BF Turbuhaler.

†Some missing data for this parameter: n=248 for asthma on BF Spiromax, n=740 for asthma on BF Turbuhaler, n=346 for COPD on BF Turbuhaler.

## Outcomes analyses

Descriptive statistics of disease outcomes in the matched patients are shown in **Table 2**. The FDC average daily dose was numerically lower among patients using BF Spiromax among patients in the asthma group (382.1 vs 505.3 $\mu$ g) and mean percent RDC was higher among patients using BF Spiromax in both the asthma (73.1% vs 68.0%) and COPD (40.2% vs 37.1%) groups (**Table 2**).

**Table 2.** Descriptive statistics of disease outcomes in the matched cohorts of patients.

| Outcomes                                                    | Asthma patients     |                       | COPD patients       |                       |
|-------------------------------------------------------------|---------------------|-----------------------|---------------------|-----------------------|
|                                                             | BF Spiromax (n=253) | BF Turbuhaler (n=743) | BF Spiromax (n=132) | BF Turbuhaler (n=348) |
| % Risk domain control                                       | 73.1                | 68.0                  | 40.2                | 37.1                  |
| No. of exacerbations (SD)                                   | 0.3 (0.7)           | 0.4 (0.7)             | 1.1 (1.4)           | 1.0 (1.4)             |
| % Treatment stability                                       | 72.7                | 66.9                  | 39.4                | 37.1                  |
| SABA average daily dose (SD)                                | 1.4 (1.9)           | 1.5 (2.9)             | 2.6 (2.9)           | 2.4 (2.3)             |
| No. of SABA inhalers (SD)                                   | 5.1 (6.8)           | 5.5 (10.7)            | 9.5 (11.0)          | 8.7 (8.5)             |
| No. of antibiotics prescriptions (SD)                       | 0.2 (0.7)           | 0.4 (0.8)             | 0.7 (1.1)           | 0.8 (1.1)             |
| No. of acute OCS courses (SD)                               | 0.3 (0.7)           | 0.3 (0.7)             | 1.0 (1.7)           | 0.9 (1.3)             |
| FDC ICS average daily dose (SD)                             | 382.1 (351.3)       | 505.3 (585.0)         | 555.3 (427.1)       | 561.8 (646.1)         |
| No. of FDC inhalers (SD)                                    | 14.0 (8.9)          | 10.8 (5.6)            | 15.0 (6.7)          | 11.9 (5.4)            |
| No. of respiratory A&E attendances (SD)                     | 0.0 (0.1)           | 0.0 (0.1)             | 0.0 (0.2)           | 0.1 (0.4)             |
| No. of probable respiratory inpatient hospitalisations (SD) | 0.0 (0.1)           | 0.0 (0.1)             | 0.1 (0.4)           | 0.1 (0.5)             |
| No. of definite respiratory inpatient hospitalisations (SD) | 0.0 (0.1)           | 0.0 (0.1)             | 0.0 (0.3)           | 0.1 (0.4)             |
| % Probably pneumonia*                                       | 0.0                 | 0.0                   | 3.0                 | 2.3                   |
| % Definite pneumonia*                                       | 0.0                 | 0.0                   | 2.3                 | 0.6                   |

A&E, accident and emergency; BF: budesonide/formoterol; FDC: fixed dose combination; ICS, inhaled corticosteroid; OCS: oral corticosteroid; RDC: risk domain control; SABA, short acting beta agonist; SD: standard deviation.

\*A pneumonia event was defined as having a Read coded diagnosis (probable pneumonia), or a Read coded diagnosis with a hospital admission or chest x-ray within 1 month (definite pneumonia).

The lower bound of the 95% CI of the adjusted percentage difference in the frequency of achieving RDC in the combined population was -0.3%, meeting the criterion for non-inferiority of switching to BF Spiromax compared with continuing on BF Turbuhaler (**Figure 2**). Although a higher proportion of patients achieved RDC in the group who switched to BF Spiromax compared with patients who stayed on BF Turbuhaler, the difference was not statistically significant, and the mean between-group difference was less than the 10% considered to be clinically relevant.[22, 23, 30, 31] In the

1 sensitivity analysis where only BF Spiromax switchers that had three matched controls were used,  
2  
3 a significant difference was shown in the combined patients group (adjusted % difference 8.3; 95%  
4  
5 CI 1.0-15.6;  $p=0.025$ ) (data not shown). In the sensitivity analysis, the adjusted percentage  
6  
7 difference was nearly 10% in the COPD group but there was a wide confidence interval (adjusted  
8  
9 % difference 9.9; 95% CI -2.4-22.2;  $p=0.114$ ). Similarly, in the asthma group, the adjusted  
10  
11 percentage difference was 6.5% (95% CI -2.7-15.7;  $p=0.168$ ). The conditional logistic regression  
12  
13 model in all matched patients showed an adjusted OR of 1.31 (95% CI 0.99-1.73;  $p=0.061$ ) for BF  
14  
15 Spiromax versus BF Turbuhaler for RDC, which did not achieve statistical significance. However,  
16  
17 in the sensitivity analysis, the OR of 1.41 was statistically significant (95% CI 1.05-1.90;  $p=0.022$ )  
18  
19 (data not shown).

20  
21  
22  
23 Secondary outcomes shown are expressed as adjusted conditional RRs (**Figure 3a**) and ORs  
24  
25 (**Figure 3b**) separately for patients with asthma and those with COPD. Among asthma patients,  
26  
27 switchers to BF Spiromax versus BF Turbuhaler reported fewer exacerbations, were less likely to  
28  
29 use high amounts of SABA daily dose, used fewer SABA inhalers, and were more likely to achieve  
30  
31 treatment stability. Among patients with COPD, no significant differences in these endpoints were  
32  
33 seen between those who switched to BF Spiromax and those staying on BF Turbuhaler.

34  
35 Confidence intervals for patients who switched to BF Spiromax show a trend effect for lower risk of  
36  
37 being on high-dose SABA therapy and reduction in use of SABA inhalers in the COPD group. In  
38  
39 the combined patients group, significance among switchers to BF Spiromax was noted in SABA  
40  
41 average daily dose (OR 0.70; [95% CI 0.53-0.94];  $p=0.017$ ), reduction in use of SABA inhalers (RR  
42  
43 0.94; [95% CI 0.89-0.99];  $p=0.012$ ), and improved treatment stability (OR 0.74; [95% CI 0.56-0.99];  
44  
45  $p=0.041$ ).

## 46 47 48 49 50 **DISCUSSION**

51  
52 This study, the first to compare the real-world effectiveness of switching to the BF Spiromax inhaler  
53  
54 from BF Turbuhaler found that, among  $N=253$  patients with asthma and  $N=132$  patients with  
55  
56 COPD, BF Spiromax showed non-inferiority with respect to achievement of disease control to BF  
57  
58



1 Turbuhaler in matched patients with asthma and/or COPD. In the primary analysis in the combined  
2  
3 population, patients who switched to BF Spiromax had 31% higher odds of achieving RDC  
4  
5 compared with those who remained on BF Turbuhaler; however, this finding did not meet the  
6  
7 threshold for statistical significance. Patients in the asthma group who switched to BF Spiromax  
8  
9 had significantly reduced SABA use, fewer exacerbations, and greater treatment stability  
10  
11 compared with matched patients who remained on BF Turbuhaler. No significant differences  
12  
13 between patients who switched and those who did not were observed in the COPD group.  
14  
15

16  
17 The results observed in this real-world study are consistent with previous evidence gained from  
18  
19 RCTs where BF Spiromax was found to have similar efficacy to BF Turbuhaler.[32] The suggestion  
20  
21 of potential superiority on secondary outcome measures in the current study, a result which was  
22  
23 not seen in RCTs, might plausibly reflect differences in ease of use and/or adherence between the  
24  
25 inhalers when prescribed in routine care. Patients participating in respiratory RCTs usually  
26  
27 represent only between 1% and 5% of the true population of patients with asthma or COPD[33]  
28  
29 and the proportion of COPD patients in primary care who would be eligible for inclusion in recent  
30  
31 large pharmaceutically-sponsored COPD studies has ranged from 17% to 42%.[34] In addition,  
32  
33 adherence to treatment in real-world observational studies is usually much lower than in RCTs.[35]  
34  
35 Moreover, proper inhaler technique is often artificially high in clinical trials because of patient  
36  
37 selection, extensive training, and close monitoring, which may explain why minimal differences in  
38  
39 outcomes between devices have been observed in RCTs.[36] However, in daily practice, patients'  
40  
41 differential ability to correctly use their inhaler may result in larger differences in health outcomes.  
42  
43 Previous studies have shown that study participants and healthcare professionals find it easier to  
44  
45 learn how to use the Spiromax inhaler correctly, compared with other DPIs.[10,11] Furthermore,  
46  
47 patients are able to achieve slightly higher peak inspiratory flow rates with the Spiromax inhaler  
48  
49 compared with the Turbuhaler.[37]  
50  
51

52  
53 This study had clearly defined a *priori* hypothesis, endpoints, and sample size, as is recommended  
54  
55 for this type of observational research.[38] A particular strength was the non-selective patient  
56  
57 population obtained through the use of real-world data from validated databases of primary care  
58  
59

1 patients. The size and scope of these databases allowed for the collection of important clinical  
2 variables and a sufficient follow-up period for observing relevant outcomes. In addition, the study's  
3 time horizon of 1 year has minimised the impact of potential seasonal differences in disease  
4 activity.[39] Overall, the study was well-powered to investigate the primary outcome which was  
5 RDC of disease.  
6  
7  
8  
9

10  
11  
12 The inclusion of matched patients in our analysis of RDC risked introducing residual confounding  
13 due to imbalanced matching ratios. We therefore performed a sensitivity analysis in the  
14 subpopulation of patients in the BF Spiromax arm with exactly three matched patients in the BF  
15 Turbuhaler arm. Compared with patients who remained on BF Turbuhaler, patients who switched  
16 to BF Spiromax had 31% and 41% higher odds of achieving RDC in the primary analysis and  
17 sensitivity analysis, respectively, with the difference reaching statistical significance in the  
18 sensitivity analysis only. Regardless of whether significance was achieved, the difference in odds  
19 with BF Spiromax versus BF Turbuhaler is quite similar between the primary and sensitivity  
20 analyses, supporting the overall validity of our assumptions for the effect of BF Spiromax versus  
21 BF Turbuhaler on achieving disease control.  
22  
23  
24  
25  
26  
27  
28  
29  
30  
31  
32  
33  
34

35 Limitations of the study are important to note. The use of databases to evaluate outcomes depends  
36 on the information registered, which is for clinical and routine use rather than research purposes.  
37 Possible issues include the fact that hospital admissions, A&E attendances, and outpatient visits  
38 are not systematically recorded in primary care databases and the applied definition to identify  
39 asthma-related hospital admissions or A&E events may give false positive events. However, this  
40 limitation would apply equally to both groups. In addition, inhaler technique could not be taken into  
41 account for this study as this would require close observation and communication with each patient  
42 as they demonstrated their inhaler technique. Regarding the secondary outcomes, we cannot rule  
43 out the possibility that the observed differences were caused by factors unrelated to the inhalers,  
44 as patients who switched to BF Spiromax may have differed from non-switchers in ways not  
45 captured in our data set. An important limitation in observational studies is the potential for  
46 confounding of the associations arising from systematic differences between the patients being  
47  
48  
49  
50  
51  
52  
53  
54  
55  
56  
57  
58  
59  
60

1 compared. In this study, confounding was minimised where possible using matching techniques to  
2  
3 create cohorts that were comparable in terms of important demographic and clinical characteristics  
4  
5 as recommended by the Respiratory Effectiveness Group.[38] Multivariate models were adjusted  
6  
7 by those variables that continued to confound the associations of interest after matching. However,  
8  
9 in the COPD group, due to a limited number of patients, only a restricted set of variables could be  
10  
11 used for matching and model adjustment. Therefore, we cannot ensure confounding of the  
12  
13 association of interest was sufficiently addressed in this group.  
14  
15  
16

17 This real-world analysis showed that switching from BF Turbuhaler to BF Spiromax was associated  
18  
19 with no loss of symptom control and may be beneficial in some patients. These data validate, in a  
20  
21 real-world population of patients with asthma and COPD, similar efficacy to that previously  
22  
23 demonstrated in an RCT.[32] Such validation is important for primary practitioners as it provides  
24  
25 reassurance that BF Spiromax is effective in real-world primary care patients, and not just in the  
26  
27 carefully selected and closely monitored cohorts of patients typical of RCTs. It should however be  
28  
29 noted that periodical assessments of adherence, motivation and inhaler technique are still likely to  
30  
31 be required to ensure that optimal inhaler use is maintained long-term.[40-43] Further research  
32  
33 may be needed to assess the extent to which the results of this analysis are generalisable to  
34  
35 patients outside of the UK.  
36  
37  
38  
39  
40  
41  
42  
43  
44  
45  
46  
47  
48  
49  
50  
51  
52  
53  
54  
55  
56  
57  
58  
59  
60

## ACKNOWLEDGEMENTS

Derek Skinner, Francis Appiagyei and Taniith Hjelmbjerg of the Observational and Pragmatic Research Institute provided assistance with data analysis. Medical writing support was provided by Ian Grieve and Bill Watkins of Ashfield Healthcare Communications, part of UDG Healthcare plc, and was funded by Teva Pharmaceuticals. Teva provided a full review of the article. The authors were fully responsible for all content and editorial decisions, were involved at all stages of manuscript development, and have approved the final version.

## FUNDING

This study was supported by Teva Pharmaceuticals and undertaken by OPRI (<http://opri.sg>). Medical writing support was funded by Teva Pharmaceuticals.

## CONTRIBUTIONS

**JV** was involved in the design of the study, participated in the development of the analysis plan, performed the analysis of the data, participated in the interpretation of the data, and was involved in development of the manuscript and completed critical reviews. He is guarantor.

**NR** was involved in the design of the study, participated in the development of the analysis plan, participated in the interpretation of the data, and was involved in development of the manuscript and completed critical reviews.

**HB** was involved in the design of the study, participated in the development of the analysis plan, participated in the interpretation of the data, and was involved in development of the manuscript and completed critical reviews.

**MvdT** was involved in the design of the study, participated in the development of the analysis plan, participated in the interpretation of the data, and was involved in development of the manuscript and completed critical reviews.

**VC** was involved in the design of the study, participated in the development of the analysis plan, participated in the interpretation of the data, and was involved in development of the manuscript and completed critical reviews.

1 **JvB** was involved in the design of the study, participated in the development of the analysis plan,  
2 participated in the interpretation of the data, and was involved in development of the manuscript  
3 and completed critical reviews.  
4

5  
6 **LB** was involved in the design of the study, participated in the development of the analysis plan,  
7 participated in the interpretation of the data, and was involved in development of the manuscript  
8 and completed critical reviews.  
9

10  
11 **MM** was involved in the design of the study, participated in the development of the analysis plan,  
12 participated in the interpretation of the data, and was involved in development of the manuscript  
13 and completed critical reviews.  
14

15  
16 **DP** was involved in the design of the study, participated in the development of the analysis plan,  
17 participated in the interpretation of the data, and was involved in development of the manuscript  
18 and completed critical reviews.  
19  
20  
21  
22  
23  
24

## 25 **DATA SHARING**

26  
27 All relevant data are within the paper and its Supporting Information files. The dataset supporting  
28 the conclusions of this article was derived from the Clinical Practice Research Datalink  
29 (www.cprd.com) and the UK Optimum Patient Care Research Database (www.opcrd.co.uk). We do  
30 not have permission to give public access to these databases; however, researchers may request  
31 access for their own purposes. The CPRD has broad National Research Ethics Service Committee  
32 (NRES) ethics approval for purely observational research using the primary care data and  
33 established data linkages. The OPCRd has ethical approval from the National Health Service  
34 (NHS) Research Authority to hold and process anonymized research data (Research Ethics  
35 Committee reference: 15/EM/0150). This study was approved by the Anonymised Data Ethics  
36 Protocols and Transparency (ADEPT) committee (reference ADEPT0816) – the independent  
37 scientific advisory committee for the OPCRd, commissioned by the Respiratory Effectiveness  
38 Group, and the Independent Scientific Advisory Committee (ISAC) for the CPRD (registration  
39 number, 16\_086), The study was designed, implemented, and registered in accordance with the  
40 criteria of the European Network of Centres for Pharmacoepidemiology and Pharmacovigilance  
41 (ENCEPP/SDPP/13238).  
42  
43  
44  
45  
46  
47  
48  
49  
50  
51  
52  
53  
54  
55  
56  
57  
58  
59  
60

## COMPETING INTERESTS

**JV** and **VC** are employees of OPRI, which has conducted paid research in respiratory disease on behalf of the following organizations in the past 5 years: Aerocrine, AKL Research and Development Ltd, Almirall, AstraZeneca, Boehringer Ingelheim, Chiesi, GlaxoSmithKline, Meda, Mundipharma, Napp, Novartis, Orion, Takeda, Teva, Zentiva (a Sanofi company).

**NR** reports grants and personal fees from BoehringerIngelheim, Novartis, and personal fees from Teva, GSK, AstraZeneca, Chiesi, Mundipharma, Cipla, Sanofi, Sandoz, 3M, Pfizer, Zambon, outside the presented work.

**HB** is an employee of Teva Pharmaceuticals

**MvdT** was an employee of Teva Pharmaceuticals Europe BV at the time the study was conducted.

**JvB** has received consultancy fees from AstraZeneca, speaker fees from Menarini, research support from GSK, Boehringer Ingelheim, Astrazeneca and Chiesi and travel support from the European COPD Coalition and the Respiratory Effectiveness Group.

**LB** has during the last three years received honoraria for to participate or to give lectures for the following companies: ALK, AstraZeneca, Boehringer, Chiesi, GlaxoSmithKlein, Novartis and Teva.

**MM** declares no relevant competing interests.

**DP** has board membership with Aerocrine, Amgen, AstraZeneca, Boehringer Ingelheim, Chiesi, Mylan, Mundipharma, Napp, Novartis, and Teva Pharmaceuticals; consultancy agreements with Almirall, Amgen, AstraZeneca, Boehringer Ingelheim, Chiesi, GlaxoSmithKline, Mylan, Mundipharma, Napp, Novartis, Pfizer, Teva Pharmaceuticals, and Theravance; grants and unrestricted funding for investigator-initiated studies (conducted through Observational and Pragmatic Research Institute Pte Ltd) from Aerocrine, AKL Research and Development Ltd, AstraZeneca, Boehringer Ingelheim, British Lung Foundation, Chiesi, Mylan, Mundipharma, Napp, Novartis, Pfizer, Respiratory Effectiveness Group, Teva Pharmaceuticals, Theravance, UK National Health Service, Zentiva; payment for lectures/speaking engagements from Almirall, AstraZeneca, Boehringer Ingelheim, Chiesi, Cipla, GlaxoSmithKline, Kyorin, Mylan, Merck, Mundipharma, Novartis, Pfizer, Skyepharma, and Teva Pharmaceuticals; payment for manuscript preparation from Mundipharma and Teva Pharmaceuticals; payment for the development of educational materials from Mundipharma and Novartis; payment for travel/accommodation/meeting

1 expenses from Aerocrine, AstraZeneca, Boehringer Ingelheim, Mundipharma, Napp, Novartis, and  
2  
3 Teva Pharmaceuticals; funding for patient enrolment or completion of research from Chiesi,  
4  
5 Novartis, Teva Pharmaceuticals, and Zentiva; stock/stock options from AKL Research and  
6  
7 Development Ltd which produces phytopharmaceuticals; owns 74% of the social enterprise  
8  
9 Optimum Patient Care Ltd (Australia, Singapore, and UK) and 74% of Observational and  
10  
11 Pragmatic Research Institute Pte Ltd (Singapore); and is peer reviewer for grant committees of the  
12  
13 Efficacy and Mechanism Evaluation programme, and Health Technology Assessment.  
14  
15  
16  
17  
18  
19  
20  
21  
22  
23  
24  
25  
26  
27  
28  
29  
30  
31  
32  
33  
34  
35  
36  
37  
38  
39  
40  
41  
42  
43  
44  
45  
46  
47  
48  
49  
50  
51  
52  
53  
54  
55  
56  
57  
58  
59  
60

For peer review only

## REFERENCES

- 1 Masoli M, Fabian D, Holt S, et al. The global burden of asthma: executive summary of the GINA Dissemination Committee report. *Allergy* 2004;59:469–78.
- 2 Adeloye D, Chua S, Lee C, et al. Global and regional estimates of COPD prevalence: Systematic review and meta-analysis. *J Glob Health* 2015;5(2):020415.
- 3 Global Initiative for Asthma. 2017 Report. <http://ginasthma.org/> (accessed December 2017).
- 4 Vogelmeier CF, Criner GJ, Martínez FJ, et al. Global Strategy for the Diagnosis, Management, and Prevention of Chronic Obstructive Lung Disease 2017 Report: GOLD Executive Summary. *Eur Respir J* 2017;49:1700214.
- 5 Lavorini F, Magnan A, Dubus JC, et al. Effect of incorrect use of dry powder inhalers on management of patients with asthma and COPD. *Respir Med* 2008;102(4):593–604.
- 6 Al-Jahdali H, Ahmed A, Al-Harbi A, et al. Improper inhaler technique is associated with poor asthma control and frequent emergency department visits. *Allergy Asthma Clin Immunol.* 2013;9(1):8.
- 7 Price DB, Roman-Rodriguez M, McQueen RB, et al. Inhaler errors in the CRITIKAL study: Type, frequency, and association with asthma outcomes. *J Allergy Clin Immunol Pract* 2017;5:1071–81.
- 8 Canonica GW, Keegstra JR, Chrystyn H. Spiromax, a new dry powder inhaler: dose consistency under simulated real-world conditions. *J Aerosol Med Pulm Drug Deliv* 2015;28(5):309–19.
- 9 Chrystyn H, Safioti G, Keegstra JR, et al. Effect of inhalation profile and throat geometry on predicted lung deposition of budesonide and formoterol (BF) in COPD: An in-vitro comparison of Spiromax with Turbuhaler. *Int J Pharm.* 2015;491(1–2):268–76.
- 10 Sandler N, Holländer J, Långström D, et al. Evaluation of inhaler technique handling-errors, inhaler perception and preference with Spiromax, Easyhaler and Turbuhaler devices among healthy Finnish volunteers: a single site, single visit crossover study (Finhaler). *BMJ Open Resp Res* 2016;3:e000119.
- 11 Bosnic-Anticevich S, Callan C, Chrystyn H, et al. Inhaler technique mastery and maintenance in healthcare professionals trained on different devices. *J Asthma* 2017;55(1):79–88.
- 12 Weisfeld L, Gopalan G, Shu Y, Baconnet B, Shah T. Pharmacokinetics (PK) and safety of budesonide plus formoterol (BF) (160/4.5mcg) Spiromax® and BF (200/6mcg) Turbuhaler® following two inhalations (+/-charcoal [char] block) in healthy volunteers (HV). *Eur Resp J* 2013a;42 (Suppl 57):P712.



- 1 13 Weisfeld L, Gopalan G, Shu Y, Baconnet B, Shah T. Pharmacokinetics (PK) and safety of  
2 budesonide plus formoterol (BF) (320/9mcg) Spiromax<sup>®</sup> and BF (400/12mcg) Turbuhaler<sup>®</sup>  
3 following two inhalations (+/-charcoal [char] block) in healthy volunteers (HV). *Eur Resp J*  
4 2013b;42(Suppl 57):4630.  
5  
6  
7 14 Cazzola M, Ora J, Di Paolo A, et al. Onset of action of budesonide/formoterol Spiromax<sup>®</sup>  
8 compared with budesonide/formoterol Turbuhaler<sup>®</sup> in patients with COPD. *Pulm*  
9 *Pharmacol Ther* 2016;39:48–53.  
10  
11  
12 15 Optimum Patient Care Research Database (OPCRD).  
13 <http://optimumpatientcare.org/database-overview/> (accessed December 2017).  
14  
15  
16 16 Clinical Practice Research Datalink. <https://www.cprd.com/home/> (accessed December  
17 2017).  
18  
19  
20 17 Respiratory Effectiveness Group. <http://effectivenessevaluation.org/about-us/> (accessed  
21 December 2017).  
22  
23  
24 18 European Network of Centres for Pharmacoepidemiology and Pharmacovigilance.  
25 <http://www.encepp.eu/> (accessed December 2017).  
26  
27  
28 19 NHS Digital. Read codes. <https://digital.nhs.uk/article/1104/Read-Codes> (accessed  
29 December 2017).  
30  
31  
32 20 Price D, Martin RJ, Barnes N, et al. Prescribing practices and asthma control with  
33 hydrofluoroalkane-beclomethasone and fluticasone: a real-world observational study. *J*  
34 *Allergy Clin Immunol* 2010;126:511–8.  
35  
36  
37 21 Price D, Colice G, Israel E, et al. Add-on LABA in a separate inhaler as asthma step-up  
38 therapy versus increased dose of ICS or ICS/LABA combination inhaler. *ERJ Open Res*  
39 2016;2(2):00106-2015.  
40  
41  
42 22 Price D, Thomas V, von Ziegenweidt J, et al. Switching patients from other inhaled  
43 corticosteroid devices to the Easyhaler<sup>®</sup>: historical, matched-cohort study of real-life  
44 asthma patients. *J Asthma Allergy* 2014;7:31–51.  
45  
46  
47 23 Price D, Small I, Haughney J, et al. Clinical and cost effectiveness of switching asthma  
48 patients from fluticasone-salmeterol to extra-fine particle beclometasone-formoterol: a  
49 retrospective matched observational study of real-world patients. *Prim Care Respir J*  
50 2013;22:439–48.  
51  
52  
53 24 Reddel HK, Taylor DR, Bateman ED, et al. An official American Thoracic  
54 Society/European Respiratory Society statement: asthma control and exacerbations:  
55 standardizing endpoints for clinical asthma trials and clinical practice. *Am J Respir Crit*  
56 *Care Med* 2009;180(1):59–99.  
57  
58  
59

- 1  
2  
3  
4  
5  
6  
7  
8  
9  
10  
11  
12  
13  
14  
15  
16  
17  
18  
19  
20  
21  
22  
23  
24  
25  
26  
27  
28  
29  
30  
31  
32  
33  
34  
35  
36  
37  
38  
39  
40  
41  
42  
43  
44  
45  
46  
47  
48  
49  
50  
51  
52  
53  
54  
55  
56  
57  
58  
59  
60
- 25 Hagedorn C, Kassner F, Banik N, Ntampakas P, Fielder K. Influence of salmeterol/fluticasone via single versus separate inhalers on exacerbations in severe/very severe COPD. *Respir Med* 2013;107(4):542–9.
- 26 Israel E, Roche N, Martin RJ, et al. Increased dose of inhaled corticosteroid versus add-on long-acting beta-agonist for step-up therapy in asthma. *Ann Am Thor Soc* 2015;12(6):798–806.
- 27 Stuart EA, Ialongo NS. Matching methods for selection of subjects for follow-up. *Multivariate Behav Res* 2010;45(4):746–65.
- 28 Rosenbaum PR, Rubin DB. Constructing a control group using multivariate matched sampling methods that incorporate the propensity score. *The American Statistician* 1985;39:33–8.
- 29 Austin PC. An introduction to propensity score methods for reducing the effects of confounding in observational studies. *Multivariate Behav Res* 2011;46(3):399–424.
- 30 Huitfeldt B, Hummel J, European Federation of Statisticians in the Pharmaceutical I. The draft FDA guideline on non-inferiority clinical trials: a critical review from European pharmaceutical industry statisticians. *Pharm Stat* 2011;10(5):414–9.
- 31 Chapman KR, Bergeron C, Bhutani M, et al. Do we know the minimal clinically important difference (MCID) for COPD exacerbations? *COPD* 2013;10(2):243–9.
- 32 Virchow JC, Rodriguez-Roisin R, Papi A, Shah TP, Gopalan G. A randomized, double-blinded, double-dummy efficacy and safety study of budesonide-formoterol Spiromax<sup>®</sup> compared to budesonide-formoterol Turbuhaler<sup>®</sup> in adults and adolescents with persistent asthma. *BMC Pulm Med*. 2016;16:42.
- 33 Herland K, Akselsen JP, Skjønberg OH, Bjermer L. How representative are clinical study patients with asthma or COPD for a larger “real life” population of patients with obstructive lung disease. *Respir Med* 2005;99:11–9.
- 34 Kruis AL, Stallberg B, Jones RCM, et al. Primary care COPD patients compared with large pharmaceutically-sponsored COPD studies: An UNLOCK validation study. *PLOS One* 2014;9(3)e90145.
- 35 Price D, Brusselle G, Roche N, Freeman D, Chisholm A. Real-world research and its importance in respiratory medicine. *Breathe (Sheffield, England)* 2015;11(1):26–38.
- 36 Dolovich MB, Ahrens RC, Hess DR, et al. Device selection and outcomes of aerosol therapy: Evidence-based guidelines: American College of Chest Physicians/American College of Asthma, Allergy, and Immunology. *Chest* 2005;127(1):335–71.

- 1 37 Azouz W, Chetcuti P, Hosker H, Saralaya D, Chrystyn H. Inhalation characteristics of  
2 asthma patients, COPD patients and healthy volunteers with the Spiromax<sup>®</sup> and  
3 Turbuhaler<sup>®</sup> devices: a randomised, cross-over study. *BMC Pulm Med* 2015;15:47.  
4  
5  
6 38 Roche N, Reddel H, Martin R, et al. Quality standards for real-world research: Focus on  
7 observational database studies of comparative effectiveness. *Ann Am Thorac Soc*  
8 2014;11(Suppl. 2):S99–104.  
9  
10  
11 39 Jenkins CR, Celli B, Anderson JA, et al. Seasonality and determinants of moderate and  
12 severe COPD exacerbations in the TORCH study. *Eur Resp J*. 2012;39(1):38–45.  
13  
14 40 Broeders ME, Sanchis S, Levy ML, et al. The ADMIT series—issues in inhalation therapy.  
15 2. Improving technique and clinical effectiveness. *Prim Care Respir J* 2009;18(2):76–82.  
16  
17 41 Ovchinkova L, Smith L, Bosnic-Anticevich S. Inhaler technique maintenance: gaining an  
18 understanding from the patient's perspective. *J Asthma* 2011;48:616–24.  
19  
20  
21 42 Bosnic-Anticevich SZ, Sinha H, So S, et al. Metered-dose inhaler technique: the effect of  
22 two educational interventions delivered in community pharmacy over time. *J Asthma*  
23 2010;47:251–6.  
24  
25  
26 43 Crane MA, Jenkins CR, Goeman DP, et al. Inhaler device technique can be improved in  
27 older adults through tailored education: findings from a randomised controlled trial. *NPJ*  
28 *Prim Care Respir Med* 2014;24:14034.  
29  
30  
31 44 Greenland S. Modeling and variable selection in epidemiologic analysis. *Am J Publ Health*  
32 1989;79:340–9.  
33  
34  
35  
36  
37  
38  
39  
40  
41  
42  
43  
44  
45  
46  
47  
48  
49  
50  
51  
52  
53  
54  
55  
56  
57  
58  
59  
60

1 **Figure legends:**  
2  
3

4 **Figure 1.** Patient flow diagram (prior to matching)  
5  
6

7 **Figure 2.** Frequency of achievement of RDC in patients switching to BF Spiromax and those  
8 continuing on BF Turbuhaler  
9

10  
11 **Figure 3.** Clinical outcomes expressed as adjusted conditional (A) rate ratios (95% CI) and (B)  
12 odds ratios (95% CI), among patients switching to BF Spiromax versus continuing on BF  
13 Turbuhaler in the matched analysis. \*Model did not converge in the asthma group.  
14  
15  
16  
17  
18  
19  
20  
21  
22  
23  
24  
25  
26  
27  
28  
29  
30  
31  
32  
33  
34  
35  
36  
37  
38  
39  
40  
41  
42  
43  
44  
45  
46  
47  
48  
49  
50  
51  
52  
53  
54  
55  
56  
57  
58  
59  
60

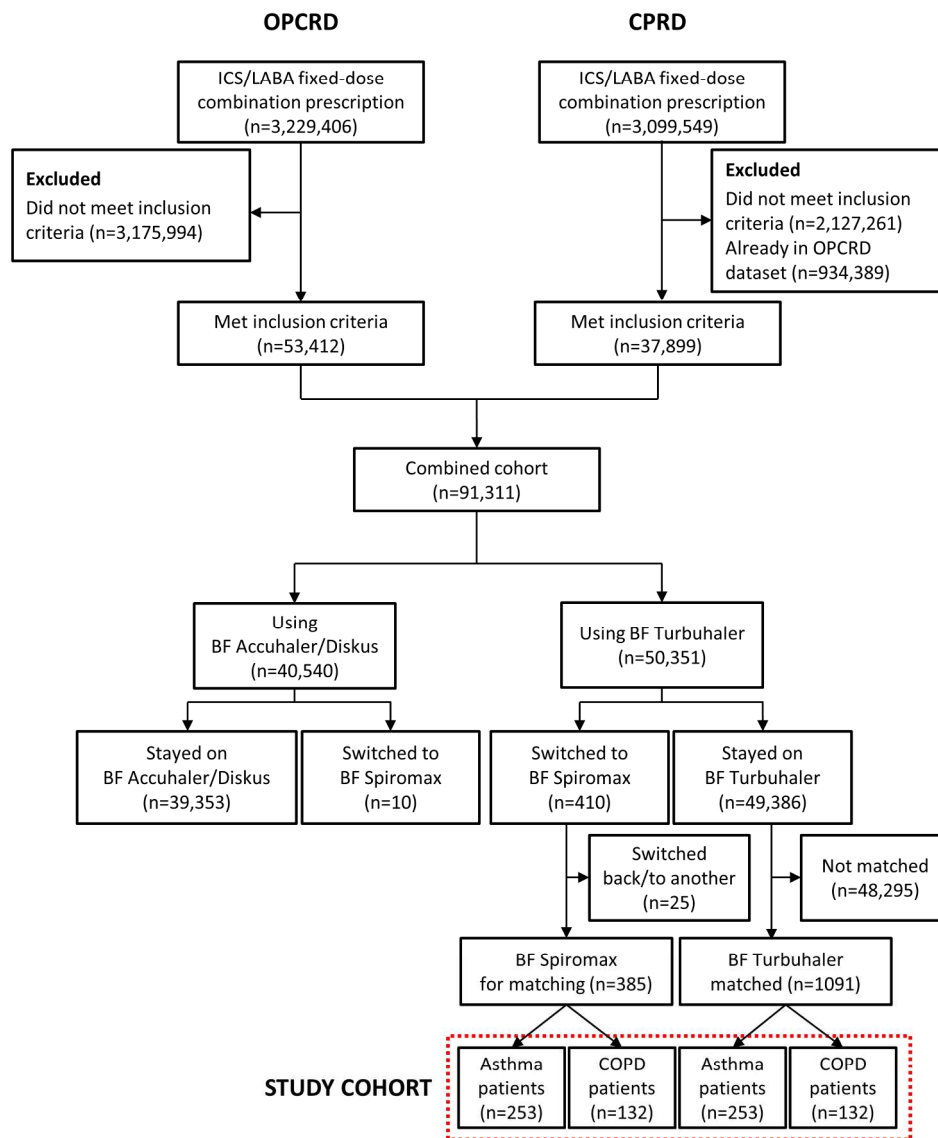

Patient flow diagram (prior to matching)

180x230mm (300 x 300 DPI)

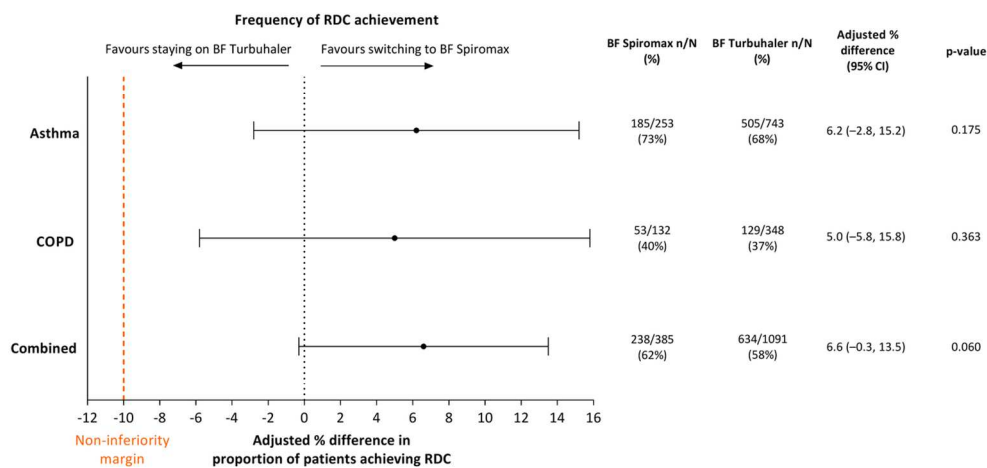

Frequency of achievement of RDC in patients switching to BF Spiromax and those continuing on BF Turbuhaler

120x58mm (300 x 300 DPI)

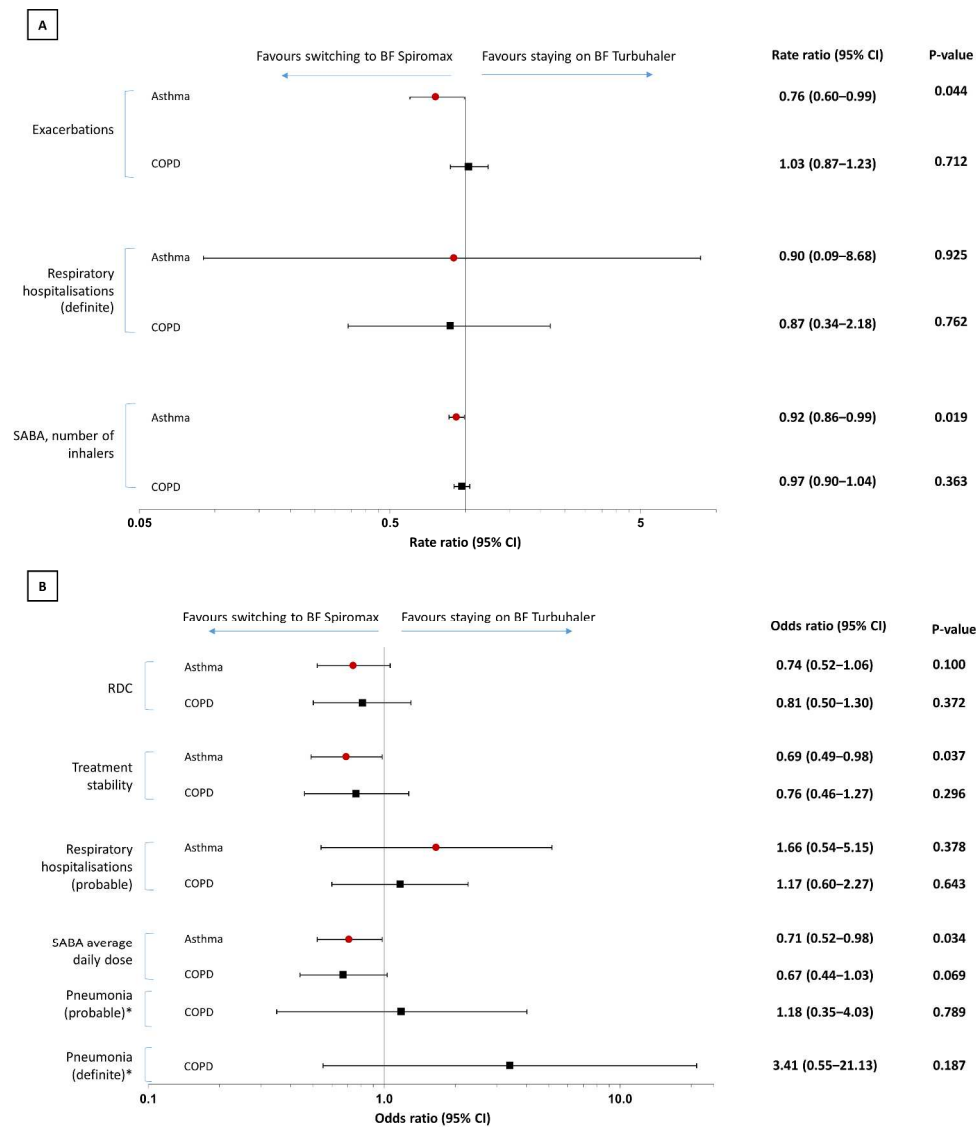

Clinical outcomes expressed as adjusted conditional (A) rate ratios (95% CI) and (B) odds ratios (95% CI), among patients switching to BF Spiromax versus continuing on BF Turbuhaler in the matched analysis.

\*Model did not converge in the asthma group.

338x399mm (300 x 300 DPI)

## Supplementary Methods

### Matching

Matching was done using the most relevant confounders of the association between the treatment (BF Spiromax vs. BF Turbuhaler) and the primary outcome (achieving risk domain control [RDC]).

Confounders that are unbalanced between the treatment arms can bias associations of interest between the treatment arms and the outcomes. Potential confounders were identified based on a combination of baseline imbalance, bias potential in relation to the primary outcome, as well as expert judgement. Through this, the most relevant confounders were used for direct matching. As it is necessary to limit the number of variables used for direct matching to avoid overly restricting the patient population, variables that do not relevantly affect the association of interest were excluded.

After matching, this approach was repeated in the matched sample to identify any residual confounding, selecting confounders for direct adjustment in the outcome analyses.

### Baseline balance

Together with the baseline characterisation, the difference between the arms was quantified using the standardized mean difference (SMD). This measure is not affected by the number of observations in a sample, gives the size of the difference, and, thus, is a better way to judge imbalance than a P-value of a hypothesis test of difference. The SMD was calculated as described below. A SMD of  $\leq 10\%$  was taken as sufficient balance between the arms.

### Formulae for standardised difference

Continuous covariate:

$$SDD = \frac{(\bar{x}_t - \bar{x}_r)}{\sqrt{\frac{s_t^2 + s_r^2}{2}}}$$

where  $\bar{x}_t$ ,  $\bar{x}_r$  denote the sample means and  $s_t, s_r$  the standard deviations

Binary Covariate:

$$SDD = \frac{(\hat{p}_t - \hat{p}_r)}{\sqrt{\frac{\hat{p}_t(1-\hat{p}_t) + \hat{p}_r(1-\hat{p}_r)}{2}}}$$

where  $\hat{p}_t, \hat{p}_r$  denote the proportion of patients in each category

Categorical (>2 categories) Covariate:

$$SDD = \sqrt{(T - C)'S^{-1}(T - C)}$$

where  $S$  is a  $(k - 1) \times (k - 1)$  covariance matrix:

$$S = [S_{kl}] = \begin{cases} \frac{\hat{p}_{1k}(1 - \hat{p}_{1k}) + \hat{p}_{2k}(1 - \hat{p}_{2k})}{2}, & k = l \\ \frac{\hat{p}_{1k}\hat{p}_{1l} + \hat{p}_{2k}\hat{p}_{2l}}{2}, & k \neq l \end{cases}$$

,  $= (\hat{p}_{12}, \dots, \hat{p}_{1k})'$ ,  $C = (\hat{p}_{22}, \dots, \hat{p}_{2k})'$  and  $\hat{p}_{jk} = P(\text{category } k | \text{treatment arm } j)$ ,  $j = 1, 2$ ,  $k = 2, 3, \dots, k$



### *Bias potential*

Bias potential assesses the degree to which the observed association between the exposure of interest and the outcome is affected by conditioning on another variable. It is also called change-in-estimate. In the case of the primary outcome, a binary indicator for achieving RDC, the definition of bias potential was:

$$\text{Bias potential} = \text{abs}(1 - e^{(\beta_{\text{crude}} - \beta_{\text{adjusted}})})$$

where  $\beta_{\text{crude}} = \ln(\text{OR})$  (=natural log of the odds ratio) of exposure from the model without the covariate and  $\beta_{\text{adjusted}} = \ln(\text{OR})$  of exposure after adding the covariate to the model. It is called *bias potential* since the bias was estimated without other covariates in the model. To what extent a variable introduces bias into a model will depend on the total model.

A bias potential of  $\geq 2\%$  was considered to indicate a relevant change in the association between the outcome and exposure. Often a cut-off of 5% or even 10% is used to select confounders during model building [44], but a more sensitive cut-off was applied for this study.

The baseline variables with the highest bias potential, that were also insufficiently balanced (SMD  $> 10\%$ ), were presented to a panel of clinical experts for the final selection of variables to use for matching.

### *Matching process*

Exact matching for categorical variables and matching within a maximum calliper (maximum distance allowed between a case and a control) for continuous variables was used to match patients, using nearest neighbour variable mixed matching with a match maximum of 3:1 without replacement. Patients in the asthma and COPD groups were matched separately with disease-specific matching criteria.

Mixed matching is a process that utilises more of the data by matching varying numbers of control arm patients to a treatment arm patient. In other words, there will be a cohort of unique patients matched 1:1, another cohort of unique patients matched 2:1, and a third cohort of unique patients matched 3:1. The analyses were conducted using all the matched patients even though some patients had 1 matched control while other patients had 3 matched controls. This imbalance in number of controls matched to cases could introduce residual confounding. Therefore, we verified our assumption that this would not affect the study outcomes through a sensitivity analysis, in which the outcome analyses were also undertaken in the subpopulation of patients in the BF Spiromax arm with exactly 3 matched patients in the BF Turbuhaler arm.

Although the patients in the BF Turbuhaler arm could have multiple records per patient to optimise

1  
2 the matching process, only one record per patient contributed to the matching.  
3

4 Matching was repeated 20 times with a different random patient sequence to select the run that  
5 resulted in the highest number of matched patients.  
6  
7

8 Missing data were treated as random and were not imputed. If a selected confounder had more than  
9 20% of missing data, it was not considered as a potential matching variable. If the proportion of  
10 missing data was below 20%, the variable was encoded into a categorical variable, adding a  
11 category for the observations with missing values, enabling this variable to be used for matching.  
12  
13  
14  
15  
16

### 17 *Post-matching evaluation*

18  
19 The quality of the matching was evaluated using the same methods used to identify the confounders:  
20 standardised difference in combination with bias potential.  
21  
22

23 To minimise the number of covariates used to adjust the outcome model, a forward assessment of  
24 bias potential was used. The identified confounders were entered one-by-one, and the relative  
25 change in the effect size of exposure was assessed against the effect size before introducing the  
26 variable. If the relative change in effect size was  $\geq 0.02$ , the variables remained in the model, and the  
27 next one was evaluated.  
28  
29  
30  
31  
32  
33  
34  
35  
36  
37  
38  
39  
40  
41  
42  
43  
44  
45  
46  
47  
48  
49  
50  
51  
52  
53  
54  
55  
56  
57  
58  
59  
60

Supplementary Table 1. Patient characteristics in unmatched analysis

| Variable                                 | Asthma                 |                                |         |      | COPD                      |                                |         |      |
|------------------------------------------|------------------------|--------------------------------|---------|------|---------------------------|--------------------------------|---------|------|
|                                          | BF Spiromax<br>(n=265) | BF<br>Turbuhaler<br>(n=32,071) | P-Value | SMD  | BF<br>Spiromax<br>(n=155) | BF<br>Turbuhaler<br>(n=17,315) | P-Value | SMD  |
| <b>Mean (SD) age, years</b>              | 56.3 (15.5)            | 50.4 (17.4)                    | <0.0001 | 12.1 | 70.2 (9.1)                | 69.9 (11.0)                    | 0.0109  | 3.5  |
| <b>Males, n (%)</b>                      | 121 (45.7)             | 13,520 (42.2)                  | <0.0001 | 5.5  | 77 (49.7)                 | 9,198 (53.1)                   | 0.5883  | 0.6  |
| <b>Body mass index, n (%)</b>            |                        |                                |         |      |                           |                                |         |      |
| <18.5 kg/m <sup>2</sup>                  | 4 (1.6)                | 395 (1.3)                      | <0.0001 | 5.2  | 7 (4.6)                   | 725 (4.2)                      | 0.0001  | 5.3  |
| ≥18.5 to <25 kg/m <sup>2</sup>           | 68 (27.2)              | 8,604 (27.8)                   |         |      | 48 (31.8)                 | 5,480 (32.0)                   |         |      |
| ≥25 to <30 kg/m <sup>2</sup>             | 89 (35.6)              | 10,614 (34.3)                  |         |      | 50 (33.1)                 | 5,685 (33.2)                   |         |      |
| ≥30 kg/m <sup>2</sup>                    | 89 (35.6)              | 11,325 (36.6)                  |         |      | 46 (30.5)                 | 5,239 (30.6)                   |         |      |
| <b>Smoking status, n (%)</b>             |                        |                                |         |      |                           |                                |         |      |
| Non-smoker                               | 129 (49.6)             | 17,291 (54.2)                  | 0.1366  | 2.0  | 18 (11.6)                 | 2,518 (14.6)                   | <0.0001 | 10.7 |
| Current smoker                           | 47 (18.1)              | 5,736 (18.0)                   |         |      | 42 (27.1)                 | 4,948 (28.7)                   |         |      |
| Ex-smoker                                | 84 (32.3)              | 8,857 (27.8)                   |         |      | 95 (61.3)                 | 9,800 (56.8)                   |         |      |
| <b>Comorbidities, n (%)</b>              |                        |                                |         |      |                           |                                |         |      |
| Ischaemic heart disease                  | 15 (5.7)               | 1,945 (6.1)                    | <0.0001 | 8.5  | 29 (18.7)                 | 3,771 (21.8)                   | 0.0021  | 3.4  |
| Heart failure                            | 1 (0.4)                | 338 (1.1)                      | <0.0001 | 5.7  | 5 (3.2)                   | 1,115 (6.4)                    | 0.0228  | 2.2  |
| Diabetes                                 | 21 (7.9)               | 2,297 (7.2)                    | <0.0001 | 8.5  | 20 (12.9)                 | 2,533 (14.6)                   | 0.0273  | 2.6  |
| Probable pneumonia                       | 1 (0.4)                | 136 (0.4)                      | 0.6341  | 0.9  | 2 (1.3)                   | 298 (1.7)                      | 0.0023  | 3.5  |
| GERD                                     | 41 (15.5)              | 3,896 (12.1)                   | 0.0001  | 3.8  | 25 (16.1)                 | 2,709 (15.6)                   | 0.0030  | 3.5  |
| Rhinitis                                 | 63 (23.8)              | 6,341 (19.8)                   | 0.2007  | 0.8  | 17 (11.0)                 | 1,544 (8.9)                    | <0.0001 | 7.2  |
| <b>Charlson Comorbidity Index, n (%)</b> |                        |                                |         |      |                           |                                |         |      |
| 0                                        | 74 (27.9)              | 10,394 (32.4)                  | <0.0001 | 8.1  | 102 (65.8)                | 10,018 (57.9)                  | 0.0002  | 4.3  |
| 1–4                                      | 164 (61.9)             | 19,749 (61.6)                  |         |      | 37 (23.9)                 | 5,220 (30.1)                   |         |      |
| ≥5                                       | 27 (10.2)              | 1,928 (6.0)                    |         |      | 16 (10.3)                 | 2,077 (12.0)                   |         |      |
| <b>Drug therapy, n (%)</b>               |                        |                                |         |      |                           |                                |         |      |
| ICS+LABA                                 | 225 (84.9)             | 26,879 (83.8)                  | <0.0001 | 13.0 | 38 (24.5)                 | 6,987 (40.4)                   | <0.0001 | 21.7 |
| ICS+LABA+LAMA                            | 11 (4.2)               | 615 (1.9)                      |         |      | 108 (69.7)                | 9,244 (53.4)                   |         |      |
| ICS+LABA+LAMA+LTRA                       | 4 (1.5)                | 298 (0.9)                      |         |      | 8 (5.2)                   | 625 (3.6)                      |         |      |
| ICS+LABA+LTRA                            | 25 (9.4)               | 4,278 (13.3)                   |         |      | 1 (0.6)                   | 459 (2.7)                      |         |      |
| Other                                    | 0 (0.0)                | 1 (0.0)                        |         |      | 0 (0.0)                   | 0 (0.0)                        |         |      |

|                                                     |            |               |         |      |           |              |         |       |
|-----------------------------------------------------|------------|---------------|---------|------|-----------|--------------|---------|-------|
| <b>SABA average daily dose, n (%)</b>               |            |               |         |      |           |              |         |       |
| 0                                                   | 65 (27.2)  | 9,929 (34.2)  | <0.0001 | 1.4  | 27 (18.4) | 3,927 (25.7) | 0.0003  | 4.8   |
| >0 to ≤200 µg*                                      | 74 (31.0)  | 8,268 (28.4)  |         |      | 23 (15.6) | 3,109 (20.4) |         |       |
| >200 to ≤400 µg*                                    | 57 (23.8)  | 6,576 (22.6)  |         |      | 37 (25.2) | 3,487 (22.8) |         |       |
| >400 to ≤600 µg*                                    | 27 (11.3)  | 2,237 (7.7)   |         |      | 32 (21.8) | 2,524 (16.5) |         |       |
| >600 µg*                                            | 16 (6.7)   | 2,058 (7.1)   |         |      | 28 (19.0) | 2,215 (14.5) |         |       |
| <b>ICS average daily dose, n (%)</b>                |            |               |         |      |           |              |         |       |
| ≤400 µg <sup>†</sup>                                | 113 (42.6) | 17,184 (53.6) | <0.0001 | 77.9 | 33 (21.3) | 5,886 (34.0) | <0.0001 | 150.1 |
| >400 to ≤800 µg <sup>†</sup>                        | 103 (38.9) | 10,701 (33.4) |         |      | 77 (49.7) | 7,369 (42.6) |         |       |
| >800 to ≤1600 µg <sup>†</sup>                       | 44 (16.6)  | 3,772 (11.8)  |         |      | 41 (26.5) | 3,497 (20.2) |         |       |
| >1600 µg <sup>†</sup>                               | 5 (1.9)    | 414 (1.3)     |         |      | 4 (2.6)   | 563 (3.3)    |         |       |
| <b>No. of exacerbations in baseline year, n (%)</b> |            |               |         |      |           |              |         |       |
| 0                                                   | 203 (76.6) | 23,095 (72.0) | <0.0001 | 16.4 | 59 (38.1) | 6,477 (37.4) | <0.0001 | 9.9   |
| 1                                                   | 45 (17.0)  | 5,503 (17.2)  |         |      | 46 (29.7) | 4,381 (25.3) |         |       |
| 2                                                   | 12 (4.5)   | 2,108 (6.6)   |         |      | 16 (10.3) | 2,772 (16.0) |         |       |
| ≥3                                                  | 5 (1.9)    | 1365 (4.3)    |         |      | 34 (21.9) | 3,685 (21.3) |         |       |
| <b>Disease control using RDC, n (%)</b>             | 184 (69.4) | 19,082 (59.5) | <0.0001 | 8.7  | 59 (38.1) | 6,477 (37.4) | <0.0001 | 7.6   |

\*Salbutamol equivalents; <sup>†</sup>Beclomethasone equivalents.

P-value = p-value for the Kruskal-Wallis equality-of-populations rank test, or the Pearson's chi-square test of independent categories, where appropriate

BF, budesonide/formoterol; GERD, gastroesophageal reflux disease; ICS, inhaled corticosteroid; LABA, long-acting  $\beta_2$ -agonist; LAMA, long-acting muscarinic antagonist; LTRA, leukotriene receptor antagonist; RDC, risk domain control; SABA, short-acting  $\beta_2$ -agonist; SD, standard deviation; SMD, standardized mean difference

# BMJ Open

## Real-world effectiveness evaluation of budesonide/formoterol Spiromax® for the management of asthma and chronic obstructive pulmonary disease in the United Kingdom

|                                 |                                                                                                                                                                                                                                                                                                                                                                                                                                                                                                                                                                                                                                                                                                                                                                                                                                |
|---------------------------------|--------------------------------------------------------------------------------------------------------------------------------------------------------------------------------------------------------------------------------------------------------------------------------------------------------------------------------------------------------------------------------------------------------------------------------------------------------------------------------------------------------------------------------------------------------------------------------------------------------------------------------------------------------------------------------------------------------------------------------------------------------------------------------------------------------------------------------|
| Journal:                        | <i>BMJ Open</i>                                                                                                                                                                                                                                                                                                                                                                                                                                                                                                                                                                                                                                                                                                                                                                                                                |
| Manuscript ID                   | bmjopen-2018-022051.R1                                                                                                                                                                                                                                                                                                                                                                                                                                                                                                                                                                                                                                                                                                                                                                                                         |
| Article Type:                   | Research                                                                                                                                                                                                                                                                                                                                                                                                                                                                                                                                                                                                                                                                                                                                                                                                                       |
| Date Submitted by the Author:   | 06-Jul-2018                                                                                                                                                                                                                                                                                                                                                                                                                                                                                                                                                                                                                                                                                                                                                                                                                    |
| Complete List of Authors:       | Voorham, Jaco; Observational and Pragmatic Research Institute Pte Ltd, Roche, Nicolas; Hôpitaux Universitaires Paris Centre, Cochin Hospital (APHP), University Paris Descartes (EA2511)<br>Benhaddi, Hicham ; Teva Pharmaceuticals<br>van der Tol, Marianka ; Teva Pharmaceuticals Europe B.V.<br>Carter, Victoria ; Observational and Pragmatic Research Institute Pte Ltd<br>Van Boven, Job; University Medical Center Groningen, University of Groningen, Department of General Practice & Elderly Care<br>Bjermer, Leif; Skåne University Hospital, Respiratory Medicine and Allergology<br>Miravittles, Marc; Hospital General Universitari Vall d'Hebron, Barcelona, Spain, Pneumology<br>Price, David; Observational and Pragmatic Research Institute Pte Ltd; University of Aberdeen, Centre of Academic Primary Care |
| <b>Primary Subject Heading</b>: | Respiratory medicine                                                                                                                                                                                                                                                                                                                                                                                                                                                                                                                                                                                                                                                                                                                                                                                                           |
| Secondary Subject Heading:      | Respiratory medicine                                                                                                                                                                                                                                                                                                                                                                                                                                                                                                                                                                                                                                                                                                                                                                                                           |
| Keywords:                       | Asthma < THORACIC MEDICINE, budesonide/formoterol, chronic obstructive pulmonary disease, comparative effectiveness research, disease control, inhalation devices                                                                                                                                                                                                                                                                                                                                                                                                                                                                                                                                                                                                                                                              |
|                                 |                                                                                                                                                                                                                                                                                                                                                                                                                                                                                                                                                                                                                                                                                                                                                                                                                                |

SCHOLARONE™  
Manuscripts

1 **Real-world effectiveness evaluation of budesonide/formoterol Spiromax<sup>®</sup> for the**  
2  
3 **management of asthma and chronic obstructive pulmonary disease in the United**  
4  
5 **Kingdom**  
6  
7  
8

9 **Running title:** Real-world effectiveness of BF Spiromax<sup>®</sup>  
10  
11  
12

13 **Authors:** Jaco Voorham<sup>1</sup>, Nicolas Roche<sup>2</sup>, Hicham Benhaddi<sup>3</sup>, Marianka van der Tol<sup>4</sup>, Victoria  
14 Carter<sup>1</sup>, Job F.M. van Boven<sup>5</sup>, Leif Bjermer<sup>6</sup>, Marc Miravittles<sup>7</sup>, David Price<sup>1,8</sup>  
15  
16

17 **Affiliations:**  
18

- 19  
20 1. Observational and Pragmatic Research Institute Pte Ltd, Singapore  
21  
22 2. Hôpitaux Universitaires Paris Centre, Cochin Hospital (APHP), University Paris Descartes  
23 (EA2511), Paris, France  
24  
25 3. Teva Pharmaceuticals, Wilrijk, Belgium  
26  
27 4. Teva Pharmaceuticals Europe B.V., Amsterdam, The Netherlands  
28  
29 5. Department of General Practice & Elderly Care, Groningen Research Institute for Asthma and  
30 COPD (GRIAC), University Medical Centre Groningen, University of Groningen, Groningen, The  
31 Netherlands  
32  
33 6. Respiratory Medicine and Allergology, Skåne University Hospital, Lund, Sweden  
34  
35 7. Pneumology Department. Hospital Universitari Vall d'Hebron, CIBER de Enfermedades  
36 Respiratorias (CIBERES), Barcelona, Spain  
37  
38 8. Centre of Academic Primary Care, University of Aberdeen, Aberdeen, UK  
39  
40  
41  
42  
43  
44

45 **Corresponding author details:** Jaco Voorham  
46

47 Postal address: Observational and Pragmatic Research Institute Pte Ltd, Unit 33 & 60, Paya Lebar  
48 Rd, Singapore 409051  
49

50 Email: [jaco@opri.sg](mailto:jaco@opri.sg)  
51

52 Telephone: +351 214 055 027  
53

54 Word count: 4352 words; 44 references; 2 tables; 3 figures; supplementary methods; 1  
55 supplementary table  
56  
57  
58

**ABSTRACT** (300 words of 300 allowed)

**Objectives:** Budesonide/formoterol (BF) Spiromax<sup>®</sup> is an inhaled corticosteroid (ICS)/long-acting  $\beta_2$ -agonist (LABA) fixed-dose combination inhaler, designed to minimise common inhaler errors and provide reliable and consistent dose delivery in asthma and chronic obstructive pulmonary disease (COPD). We evaluated non-inferiority of BF Spiromax after changing from another FDC inhaler, compared with continuing the original inhaler.

**Methods:** Patients with asthma and/or COPD who switched to BF Spiromax were matched (1:3) with non-switchers. Data were from Optimum Patient Care Research Database and Clinical Practice Research Datalink in the United Kingdom (UK). Primary endpoint was proportion of patients achieving disease control (using Risk Domain Control [RDC] algorithm); secondary endpoints were: exacerbation rate, short-acting  $\beta_2$ -agonists (SABA) use, and treatment stability (achieved RDC; no maintenance treatment change). Non-inferiority was defined as having 95% confidence interval (CI) lower bound above  $-10\%$ , using conditional logistic regression and adjusted for relevant confounders.

**Results:** Comparing 385 matched patients (asthma 253; COPD 132) who switched to BF Spiromax with 1091 (asthma 743; COPD 348) non-switchers, non-inferiority of BF Spiromax in RDC was demonstrated (adjusted difference:  $+6.6\%$ ; 95% CI:  $-0.3-13.5$ ). Among asthma patients, switchers to BF Spiromax versus BF Turbuhaler reported fewer exacerbations (adjusted rate ratio [RR] 0.76 [95% CI 0.60-0.99];  $p=0.044$ ); were less likely to use high SABA daily doses (adjusted odds ratio [OR] 0.71 [95% CI 0.52-0.98];  $p=0.034$ ); used fewer SABA inhalers (adjusted RR 0.92 [95% CI 0.86-0.99];  $p=0.019$ ); and were more likely to achieve treatment stability (adjusted OR 1.44 [95% CI 1.02-2.04];  $p=0.037$ ). No significant differences in these endpoints were seen among COPD patients.

**Conclusions:** Among UK asthma and COPD patients, real-world use of BF Spiromax was non-inferior to BF Turbuhaler in terms of disease control. Among asthma patients, switching to BF Spiromax was associated with reduced exacerbations, reduced SABA use, and improved treatment stability versus continuing on BF Turbuhaler.

**Key words/terms (from MEDLINE MeSH):** asthma, budesonide/formoterol, chronic obstructive pulmonary disease, comparative effectiveness research, disease control, inhalation devices, observational study

## Strengths and limitations of this study

- Clearly defined *a priori* hypothesis, endpoints, and sample size.
- A non-selective patient population, obtained through the use of real-world data from validated databases of primary care patients, with sufficient follow-up period for observing relevant outcomes.
- Hospital admissions, A&E attendances, and outpatient visits are not systematically recorded in primary care databases, and the applied definition to identify asthma-related hospital admissions or A&E events may have given rise to false positive events.
- Potential effects of inhaler technique on the reported outcomes could not be taken into account, as this would require close observation and communication with each patient as they demonstrated their inhaler technique.
- Observed differences in secondary outcomes could have arisen as a consequence of factors unrelated to the inhalers that might not have been captured in the dataset.



## INTRODUCTION

Asthma and chronic obstructive pulmonary disease (COPD) are common respiratory conditions.[1, 2] Cornerstone asthma/COPD treatment consists of inhaled therapy with proven efficacy in randomised clinical trials (RCTs).[3, 4] In real life, however, incorrect inhaler use is common in patients with asthma or COPD, resulting in poor symptom control and worse outcomes.[5, 6] Specifically, critical inhaler errors were reported in a review of 3660 patients:[7] insufficient respiratory effort in dry-powder inhaler (DPI) users and actuation before inhalation in metered-dose inhaler (MDI) users were found to be associated with uncontrolled asthma.[7]

In April 2014, marketing authorisation was granted for DuoResp<sup>®</sup> Spiromax<sup>®</sup> (Teva Pharmaceutical Industries, Petach Tikva, Israel), an inhaler containing a fixed-dose combination (FDC) of the inhaled corticosteroid (ICS) budesonide and the long-acting  $\beta_2$ -agonist (LABA) formoterol (budesonide/formoterol [BF]). The Spiromax<sup>®</sup> inhaler was designed to maximise ease of use, reliability of dosing, and consistency of lung deposition[8, 9] in patients with asthma or COPD. Spiromax<sup>®</sup> is a breath-actuated, multi-dose DPI that is similar in design and appearance to a MDI, but uses different internal configuration. Drug delivery is via the X-ACT<sup>®</sup> system, consisting of active metering (upon opening the cap, an air pump transfers the drug from the drug reservoir to the dose cup) and cyclone separator technology (turbulent airflow), which breaks up the dry-powder blend and separates fine drug particles from larger lactose particles.[8] Spiromax<sup>®</sup> requires only one preparation step (opening the cap) and provides consistent dose delivery across a broad range of inspiratory flow rates.[8, 9] Recent findings suggest that Spiromax is associated with a reduced number of errors related to dose preparation, undertaking the steps needed to correctly deliver the dose during inhalation, and handling the device after inhalation, as well as being easier for patients and healthcare professionals to use compared with other DPIs.[10, 11] BF Spiromax has demonstrated pharmacokinetic bioequivalence to BF Turbuhaler<sup>®</sup> (AstraZeneca UK Limited, UK) in healthy volunteers.[12, 13] A recent independent study in COPD found BF Spiromax to have a faster onset of bronchodilation than BF Turbuhaler, likely due to differences in drug deposition between the two devices.[14] However, evidence for the real-world effectiveness of BF Spiromax in comparison with other inhalers in asthma and/or COPD patients is lacking.

1  
2  
3 The current study was part of a multi-phase assessment of real-world outcomes over 1 year in  
4 patients with asthma and/or COPD who switched to BF Spiromax compared with patients who  
5 remained on another device, using data from two United Kingdom (UK) primary care administrative  
6 databases. The primary objective of this phase of the study was to evaluate the non-inferiority of  
7 changing from another FDC inhaler to BF Spiromax versus continuing to use the original FDC  
8 inhaler, in terms of achieving disease control, based on the Risk Domain Control (RDC) algorithm;  
9 secondary objectives included the effects of the switch on the occurrence of moderate/severe  
10 exacerbations and respiratory-related hospitalisations, treatment stability, and short-acting  $\beta_2$ -  
11 agonist (SABA) use.  
12  
13  
14  
15  
16  
17  
18  
19  
20  
21  
22  
23

## 24 **METHODS**

### 25 **Patients and study design**

26  
27 This was a matched, historic cohort study of patients with asthma and/or COPD using two  
28 validated primary care databases of patients in the UK, Optimum Patient Care Research Database  
29 (OPCRD) and Clinical Practice Research Datalink (CPRD).[15, 16] The OPCRD is governed by  
30 The Anonymous Data Ethics Protocols and Transparency committee, commissioned by the  
31 Respiratory Effectiveness Group.[17] The CPRD is a UK government research service, jointly  
32 supported by the National Institute for Health Research and the Medicines and Healthcare  
33 Products Regulatory Agency, that provides access to anonymised NHS data. It operates under a  
34 range of UK and European Laws as well as NHS and other guidelines.[16] This study is registered  
35 with the European Network of Centres for Pharmacoepidemiology and Pharmacovigilance  
36 (Register Number EUPAS13238).[18]  
37  
38  
39  
40  
41  
42  
43  
44  
45  
46  
47  
48  
49  
50

51 The OPCRD and CPRD databases were searched onwards from 2010 to identify prescriptions of  
52 BF Spiromax, BF Turbuhaler, and fluticasone propionate/salmeterol (FS) Accuhaler®/Diskus®  
53 (GlaxoSmithKline, Uxbridge, UK) in patients  $\geq 18$  years of age with asthma and/or COPD (Figure  
54 1). The OPCRD and CPRD datasets for this study were constructed separately and checked for  
55  
56  
57  
58  
59  
60

1 overlap before pooling to exclude duplicate patients. Patients had to have at least 2 years of data,  
2 comprising a minimum of 1 baseline year and a 1-year outcome period. Patients were required to  
3 have at least three prescriptions for ICS/LABA FDC (BF Spiromax, BF Turbuhaler, or FS  
4 Accuhaler/Diskus) therapy during the baseline period. Switch patients must have evidence of an  
5 initial BF Spiromax prescription in the outcome period as well as at least one supplementary  
6 prescription for BF Spiromax in the 1-year outcome period to ensure consistent usage. Likewise,  
7 patients remaining on their inhaler required at least one repeat prescription in the outcome period.  
8 We only included patients switching to BF Spiromax who were registered at practices considered  
9 to have a policy of BF Spiromax adoption or wholesale change (i.e., the decision to switch inhaler  
10 was based on cost savings instead of clinical reasons). Such practices were identified as those at  
11 which  $\geq 5$  patients changed to BF Spiromax within a 3-month period. The current study includes  
12 only patients who stayed on BF Turbuhaler or switched from BF Turbuhaler to BF Spiromax, due to  
13 the low number of patients who switched from FS Accuhaler/Diskus to BF Spiromax. The date of  
14 the first prescription of BF Spiromax or the (matched) date of the repeat prescription for BF  
15 Turbuhaler in the control arm was the index date. The recommended dosing instructions of BF  
16 Turbuhaler and BF Spiromax in adults are the same (asthma: 1–2 inhalations twice daily; COPD: 2  
17 inhalations twice daily), and we observed no significant differences in prescribed dose between BF  
18 Spiromax and BF Turbuhaler in the disease groups.

19 Asthma patients were required to have a diagnostic code (Read code)[19] for asthma and/or at  
20 least two prescriptions for asthma therapy during the baseline year, and to have no other chronic  
21 respiratory disease diagnosis. COPD patients were required to be  $\geq 40$  years of age at first  
22 prescription for BF Spiromax or the matching BF Turbuhaler prescription, and to have a diagnostic  
23 code for COPD and a post-bronchodilator  $FEV_1/FVC < 0.70$  consistent with the criteria for inclusion  
24 in the UK register of patients with COPD (Quality and Outcomes Framework). The subgroup of  
25 patients with only an asthma diagnosis is referred to henceforth as the asthma group. The patients  
26 with a COPD diagnosis (with or without an asthma diagnosis) are referred to henceforth as the  
27 COPD group.

## Outcome measures

The primary outcome was disease control as assessed by RDC, a composite measure that has been used in several similar matched historical cohort studies to define absence of exacerbations.[20-23] To achieve RDC in this study, patients must not have an asthma/COPD-related hospital admission, asthma/COPD-related Accident and Emergency (A&E) attendance, or course of oral corticosteroids (OCS) during the outcome period. In addition, patients in the COPD group must not have received antibiotics for a lower respiratory tract infection (LRTI).

Secondary outcomes included the number of moderate/severe exacerbations and hospitalisations, and change in treatment stability. A moderate/severe exacerbation (for COPD) or severe exacerbation (for asthma) was defined following the American Thoracic Society/European Respiratory Society Task Force Position Statement.[24] Lower respiratory hospitalisations were identified and classified as follows: definite hospitalisations were those with a lower respiratory code, including asthma and LRTI codes; OR a generic hospitalisation Read code that has been recorded on the same day as a lower respiratory consultation; definite + probable hospitalisations were those occurring within a 7-day window (either side of the hospitalisation date) of a lower respiratory Read code. Adequate treatment stability was defined as achieving RDC and no increase in dose, change in delivery device, and change in type of ICS and/or use of LABAs, theophylline, long-acting muscarinic antagonists, or leukotriene receptor antagonists (LTRAs).[22] Additional outcomes were SABA usage, which was expressed as average daily SABA dosage during the outcome year and calculated from prescriptions as  $([Count\ of\ inhalers\ \times\ doses\ in\ pack\ \times\ \mu g\ strength] / 365)$ , and a pneumonia event which was defined as having a Read coded diagnosis (probable pneumonia), or a Read coded diagnosis with a hospital admission or chest x-ray within 1 month (definite pneumonia).

## Statistical analyses

It was estimated that 349 patients would have 90% power to demonstrate non-inferiority of BF Spiromax and BF Turbuhaler for achieving RDC, at a one-sided significance level of 0.050. For the

1 calculation, an expected difference in proportions of zero was used, assuming that the proportion  
2 of discordant pairs was 0.458. This assumption was based on previous studies showing that a  
3 weighted average of 71.6% of asthma and COPD patients prescribed FDC therapy have no  
4 exacerbations over a 1-year period.[25, 26]  
5  
6  
7  
8  
9

10  
11 Descriptive statistics of all baseline demographic characteristics, co-morbidities, medication use,  
12 indicators of disease severity and other patient characteristics were computed separately for the  
13 patients in the BF Spiromax and BF Turbuhaler groups and for patients in the asthma and COPD  
14 groups. In cases where multiple observations existed for a patient, one was randomly selected.  
15  
16 Continuous variables were summarised using the number of non-missing observations, percentage  
17 of non-missing observations, mean, standard deviation (SD), median and interquartile range  
18 (difference between the 25th and 75th percentile), and a P-value for the Kruskal-Wallis equality-of-  
19 populations rank test. Binary and categorical variables were summarised using the percentage of  
20 non-missing observations, the frequency and percentages (based on the non-missing sample size)  
21 of observed levels, and a P-value for the Pearson's chi-square test of independent categories.  
22  
23  
24  
25  
26  
27  
28  
29  
30  
31  
32

33 Patients who switched to BF Spiromax were compared with matched controls who stayed on BF  
34 Turbuhaler. Mixed matching was performed 1:3 so that each BF Spiromax patient would be  
35 matched with up to three patients who remained on BF Turbuhaler (see Supplementary methods in  
36 Appendix for a full description of the mixed matching process). Mixed matching was performed to  
37 increase precision of the effect estimates. Because the analyses were conducted on all of the  
38 matched patients, which could introduce residual confounding due to imbalanced matching ratios,  
39 a sensitivity analysis was performed in which the outcome analyses were also performed in the  
40 subpopulation of patients in the BF Spiromax arm with exactly three matched patients in the BF  
41 Turbuhaler arm. Matching was performed using the most relevant confounders which were  
42 identified based on baseline imbalance and bias potential in relation to the primary outcome. For  
43 asthma, these confounders included age, gender, number of antibiotic courses, number of OCS  
44 courses, Global Initiative for Asthma (GINA) control categories, number of exacerbations, and  
45 RDC; matching confounders for COPD included age, gender, drug therapy, ICS average daily  
46  
47  
48  
49  
50  
51  
52  
53  
54  
55  
56  
57  
58  
59  
60

1 dose, number of antibiotic courses, number of exacerbations, and Global Initiative for Chronic  
2 Obstructive Lung Disease (GOLD) risk categories. Baseline imbalance was assessed using the  
3 Standardised Mean Difference (SMD), which, unlike a P-value, is not affected by the number of  
4 observations in a sample,[27, 28] and provides information on the size of the difference. An SMD  
5 of  $\leq 10\%$  was assumed to represent sufficient balance between the arms,[29] and the formula used  
6 is presented in the Supplementary methods of the Appendix. Bias potential is the degree to which  
7 the observed association between the exposures of interest and the outcome is affected by  
8 conditioning on another variable; the formula is presented in the Supplementary methods of the  
9 Appendix. A sensitive bias potential cut off of  $\geq 2\%$  was used for this study.

10  
11  
12  
13  
14  
15  
16  
17  
18  
19  
20  
21 Baseline variables with highest bias potential that were also insufficiently balanced were presented  
22 to a panel of experts for final selection. Following matching, the process was repeated in the  
23 matched sample to identify any residual confounding.

24  
25  
26  
27  
28  
29 After mixed matching, conditional logistic regression of the between-patient difference in the  
30 primary outcome was performed to provide a 95% confidence interval (CI) with which to assess  
31 non-inferiority. Analyses were undertaken for the patients in the asthma and COPD groups  
32 combined, as well as by disease group. The model was adjusted for baseline variables that  
33 remained with bias potential after matching. Non-inferiority was claimed if the lower bound of the  
34 95% CI for the primary endpoint (RDC) was above  $-10\%$ , a difference widely regarded as clinically  
35 important for many outcomes in respiratory studies,[30,31] and used previously in similar real-life  
36 studies of patients in primary care settings.[22, 23] If non-inferiority was achieved, superiority was  
37 tested.

38  
39  
40  
41  
42  
43  
44  
45  
46  
47  
48  
49 Secondary outcomes were analysed in the matched sample and adjusted for baseline variables  
50 that remained with bias potential after matching, and reported as conditional rate ratios (RR) or  
51 odds ratios (OR) with their 95% CIs. Number of exacerbations and hospitalisations were analysed  
52 in the matched sample using conditional Poisson regression to obtain estimates of relative rates,  
53 treatment stability was analysed in the matched sample using conditional logistic regression, and  
54  
55  
56  
57  
58  
59

1 SABA usage was analysed in the matched sample using conditional ordinal logistic regression,  
2  
3 after the SABA average daily dose was categorised.  
4  
5  
6

7 All statistical analyses were conducted using Stata MP6 version 12 and Stata SE version 14  
8  
9 (StataCorp, College Station, TX). A statistically significant result was defined as  $p < 0.05$ .  
10  
11  
12

### 13 **Patient and Public Involvement**

14  
15 No patients or public were involved in the design or conduct of this retrospective database study.  
16  
17  
18  
19

## 20 **RESULTS**

### 21 **Study population**

22  
23 Overall, 420 patients switched to BF Spiromax (Figure 1). Of the patients who used BF Turbuhaler,  
24  
25 410 switched to BF Spiromax and 49,386 remained on BF Turbuhaler. Baseline characteristics of  
26  
27 these unmatched patients are shown in Supplementary Table 1, where imbalanced covariates  
28  
29 (SMD >10%) for asthma include mean age, drug therapy, ICS average daily dose, and number of  
30  
31 exacerbations in baseline years; those for COPD include smoking status, drug therapy, and ICS  
32  
33 average daily dose.  
34  
35  
36  
37  
38

39 For the matched analysis, a total of 385 patients switching to BF Spiromax were analysed; a total  
40  
41 of 1091 patients who stayed on BF Turbuhaler were matched to the switch patients (**Figure 1**).  
42  
43 Twenty-five patients who switched back to BF Turbuhaler or to another FDC ICS/LABA were not  
44  
45 included in the analysis. In the baseline characteristics of the matched patients, covariates with  
46  
47 SMD >10% in the asthma group were body mass index and ischaemic heart disease; for COPD  
48  
49 they were smoking status, ischaemic heart disease, heart failure, number of exacerbations, and  
50  
51 number of acute OCS courses (**Table 1**).  
52  
53  
54  
55  
56  
57  
58  
59  
60

**Table 1. Patient characteristics in matched analysis**

| Variable                                                     | Asthma patients        |                          |             |            | COPD patients          |                          |             |            |
|--------------------------------------------------------------|------------------------|--------------------------|-------------|------------|------------------------|--------------------------|-------------|------------|
|                                                              | BF Spiromax<br>(n=253) | BF Turbuhaler<br>(n=743) | P-<br>value | SMD<br>(%) | BF Spiromax<br>(n=132) | BF Turbuhaler<br>(n=348) | P-<br>value | SMD<br>(%) |
| <b>Mean (SD) age, years</b>                                  | 55.9 (15.3)            | 55.8 (15.1)              | 0.9101      | 0.7        | 70.5 (8.8)             | 70.5 (8.5)               | 0.9512      | 0.2        |
| <b>Males, n (%)</b>                                          | 112 (44.3)             | 331 (44.5)               | 0.9382      | 0.6        | 66 (50.0)              | 184 (52.9)               | 0.5736      | 5.7        |
| <b>Body mass index*, n (%)</b>                               |                        |                          | 0.4038      | 12.1       |                        |                          |             |            |
| <18.5 kg/m <sup>2</sup>                                      | 3 (1.3)                | 9 (1.2)                  |             |            | 6 (4.7)                | 11 (3.2)                 | 0.6977      | 7.4        |
| 18.5 to <25 kg/m <sup>2</sup>                                | 65 (27.2)              | 163 (22.5)               |             |            | 46 (35.7)              | 112 (32.4)               |             |            |
| 25 to <30 kg/m <sup>2</sup>                                  | 88 (36.8)              | 265 (36.5)               |             |            | 39 (30.2)              | 120 (34.7)               |             |            |
| >30 kg/m <sup>2</sup>                                        | 83 (34.7)              | 289 (39.8)               |             |            | 38 (29.5)              | 103 (29.8)               |             |            |
| <b>Smoking status<sup>†</sup>, n (%)</b>                     |                        |                          | 0.7393      | 5.2        |                        |                          | 0.5696      | 10.8       |
| Non-smoker                                                   | 126 (50.8)             | 397 (53.6)               |             |            | 14 (10.6)              | 48 (13.9)                |             |            |
| Current smoker                                               | 44 (17.7)              | 123 (16.6)               |             |            | 36 (27.3)              | 98 (28.3)                |             |            |
| Ex-smoker                                                    | 78 (31.5)              | 220 (29.7)               |             |            | 82 (62.1)              | 200 (57.8)               |             |            |
| <b>Cardiovascular disease, n (%)</b>                         |                        |                          |             |            |                        |                          |             |            |
| Ischaemic heart disease                                      | 13 (5.1)               | 62 (8.3)                 | 0.0951      | 12.8       | 22 (16.7)              | 78 (22.4)                | 0.1662      | 14.5       |
| Heart failure                                                | 1 (0.4)                | 8 (1.1)                  | 0.3225      | 8.0        | 4 (3.0)                | 23 (6.6)                 | 0.1286      | 16.7       |
| <b>Exacerbations, n (%)</b>                                  |                        |                          | 0.9869      | 3.6        |                        |                          | 0.7809      | 12.9       |
| 0                                                            | 199 (78.7)             | 593 (79.8)               |             |            | 54 (40.9)              | 156 (44.8)               |             |            |
| 1                                                            | 42 (16.6)              | 120 (16.2)               |             |            | 38 (28.8)              | 106 (30.5)               |             |            |
| 2                                                            | 7 (2.8)                | 18 (2.4)                 |             |            | 15 (11.4)              | 35 (10.1)                |             |            |
| 3                                                            | 4 (1.6)                | 9 (1.2)                  |             |            | 13 (9.8)               | 28 (8.0)                 |             |            |
| ≥4                                                           | 1 (0.4)                | 3 (0.4)                  |             |            | 12 (9.1)               | 23 (6.6)                 |             |            |
| <b>No. of respiratory-related hospital admissions, n (%)</b> |                        |                          | 1.0000      | 0          |                        |                          | 0.1460      | 2.8        |
| 0                                                            | 253 (100.0)            | 743 (100.0)              |             |            | 129 (97.7)             | 338 (97.1)               |             |            |
| 1                                                            | 0                      | 0                        |             |            | 1 (0.8)                | 9 (2.6)                  |             |            |
| ≥2                                                           | 0                      | 0                        |             |            | 2 (1.5)                | 1 (0.3)                  |             |            |
| <b>Uncontrolled risk domain control, n (%)</b>               | 70 (27.7)              | 194 (26.1)               | 0.6278      | 3.5        | 78 (59.1)              | 192 (55.2)               | 0.4397      | 7.9        |
| <b>No. of antibiotic courses, n (%)</b>                      |                        |                          |             |            |                        |                          |             |            |
| 0                                                            | 212 (83.8)             | 630 (84.8)               | 0.8362      | 5.5        | 74 (56.1)              | 198 (56.9)               | 0.9478      | 6.4        |
| 1                                                            | 34 (13.4)              | 99 (13.3)                |             |            | 37 (28.0)              | 104 (29.9)               |             |            |



| Variable                               | Asthma patients        |                          |             |            | COPD patients          |                          |             |            |
|----------------------------------------|------------------------|--------------------------|-------------|------------|------------------------|--------------------------|-------------|------------|
|                                        | BF Spiromax<br>(n=253) | BF Turbuhaler<br>(n=743) | P-<br>value | SMD<br>(%) | BF Spiromax<br>(n=132) | BF Turbuhaler<br>(n=348) | P-<br>value | SMD<br>(%) |
| 2                                      | 5 (2.0)                | 12 (1.6)                 |             |            | 11 (8.3)               | 26 (7.5)                 |             |            |
| 3                                      | 1 (0.4)                | 1 (0.1)                  |             |            | 4 (3.0)                | 8 (2.3)                  |             |            |
| ≥4                                     | 1 (0.4)                | 1 (0.1)                  |             |            | 6 (4.5)                | 12 (3.4)                 |             |            |
| <b>No. of acute OCS courses, n (%)</b> |                        |                          |             |            |                        |                          |             |            |
| 0                                      | 199 (78.7)             | 593 (79.8)               |             |            | 79 (59.8)              | 225 (64.7)               |             |            |
| 1                                      | 42 (16.6)              | 120 (16.2)               | 0.9869      | 3.6        | 28 (21.2)              | 74 (21.3)                | 0.6813      | 14.4       |
| 2                                      | 7 (2.8)                | 18 (2.4)                 |             |            | 9 (6.8)                | 20 (5.7)                 |             |            |
| 3                                      | 4 (1.6)                | 9 (1.2)                  |             |            | 7 (5.3)                | 15 (4.3)                 |             |            |
| ≥4                                     | 1 (0.4)                | 3 (0.4)                  |             |            | 9 (6.8)                | 14 (4.0)                 |             |            |
| <b>Average daily SABA dose, n (%)</b>  |                        |                          |             |            |                        |                          |             |            |
| 0                                      | 64 (25.3)              | 224 (30.1)               |             |            | 23 (17.4)              | 65 (18.7)                |             |            |
| >0 to ≤200 µg/day                      | 70 (27.7)              | 196 (26.4)               | 0.4055      | 4.9        | 22 (16.7)              | 66 (19.0)                | 0.3524      | 8.4        |
| >200 to ≤400 µg/day                    | 56 (22.1)              | 139 (18.7)               |             |            | 32 (24.2)              | 78 (22.4)                |             |            |
| >400 to ≤600 µg/day                    | 25 (9.9)               | 59 (7.9)                 |             |            | 5 (3.8)                | 29 (8.3)                 |             |            |
| >600 µg/day                            | 38 (15.0)              | 125 (16.8)               |             |            | 50 (37.9)              | 110 (31.6)               |             |            |

BF: Budesonide/formoterol; OCS: oral corticosteroids; SABA: short acting  $\beta_2$ -agonist; SD, standard deviation; SMD: standardised mean difference

\*Some missing data for this parameter: n=239 for asthma on BF Spiromax, n=726 for asthma on BF Turbuhaler; n=129 for COPD on BF Spiromax, n=346 for COPD on BF Turbuhaler.

†Some missing data for this parameter: n=248 for asthma on BF Spiromax, n=740 for asthma on BF Turbuhaler, n=346 for COPD on BF Turbuhaler.

## Outcomes analyses

Descriptive statistics of disease outcomes in the matched patients are shown in **Table 2**. The FDC average daily dose was numerically lower among patients using BF Spiromax in the asthma group (382.1 vs 505.3 µg) and mean percent RDC was higher among patients using BF Spiromax in both the asthma (73.1% vs 68.0%) and COPD (40.2% vs 37.1%) groups (**Table 2**).

**Table 2.** Descriptive statistics of disease outcomes in the matched cohorts of patients.

| Outcomes                                                    | Asthma patients     |                       | COPD patients       |                       |
|-------------------------------------------------------------|---------------------|-----------------------|---------------------|-----------------------|
|                                                             | BF Spiromax (n=253) | BF Turbuhaler (n=743) | BF Spiromax (n=132) | BF Turbuhaler (n=348) |
| % Risk domain control                                       | 73.1                | 68.0                  | 40.2                | 37.1                  |
| No. of exacerbations (SD)                                   | 0.3 (0.7)           | 0.4 (0.7)             | 1.1 (1.4)           | 1.0 (1.4)             |
| % Treatment stability                                       | 72.7                | 66.9                  | 39.4                | 37.1                  |
| SABA average daily dose (SD)                                | 1.4 (1.9)           | 1.5 (2.9)             | 2.6 (2.9)           | 2.4 (2.3)             |
| No. of SABA inhalers (SD)                                   | 5.1 (6.8)           | 5.5 (10.7)            | 9.5 (11.0)          | 8.7 (8.5)             |
| No. of antibiotics prescriptions (SD)                       | 0.2 (0.7)           | 0.4 (0.8)             | 0.7 (1.1)           | 0.8 (1.1)             |
| No. of acute OCS courses (SD)                               | 0.3 (0.7)           | 0.3 (0.7)             | 1.0 (1.7)           | 0.9 (1.3)             |
| FDC ICS average daily dose (SD)                             | 382.1 (351.3)       | 505.3 (585.0)         | 555.3 (427.1)       | 561.8 (646.1)         |
| No. of FDC inhalers (SD)                                    | 14.0 (8.9)          | 10.8 (5.6)            | 15.0 (6.7)          | 11.9 (5.4)            |
| No. of respiratory A&E attendances (SD)                     | 0.0 (0.1)           | 0.0 (0.1)             | 0.0 (0.2)           | 0.1 (0.4)             |
| No. of probable respiratory inpatient hospitalisations (SD) | 0.0 (0.1)           | 0.0 (0.1)             | 0.1 (0.4)           | 0.1 (0.5)             |
| No. of definite respiratory inpatient hospitalisations (SD) | 0.0 (0.1)           | 0.0 (0.1)             | 0.0 (0.3)           | 0.1 (0.4)             |
| % Probably pneumonia*                                       | 0.0                 | 0.0                   | 3.0                 | 2.3                   |
| % Definite pneumonia*                                       | 0.0                 | 0.0                   | 2.3                 | 0.6                   |

A&E, accident and emergency; BF: budesonide/formoterol; FDC: fixed dose combination; ICS, inhaled corticosteroid; OCS: oral corticosteroid; RDC: risk domain control; SABA, short acting beta agonist; SD: standard deviation.

\*A pneumonia event was defined as having a Read coded diagnosis (probable pneumonia), or a Read coded diagnosis with a hospital admission or chest x-ray within 1 month (definite pneumonia).

The lower bound of the 95% CI of the adjusted percentage difference in the frequency of achieving RDC in the combined population was -0.3%, meeting the criterion for non-inferiority of switching to BF Spiromax compared with continuing on BF Turbuhaler (**Figure 2**). Although a higher proportion of patients achieved RDC in the group who switched to BF Spiromax compared with patients who stayed on BF Turbuhaler, the difference was not statistically significant, and the mean between-group difference was less than the 10% considered to be clinically relevant.[22, 23, 30, 31] In the

1 sensitivity analysis where only BF Spiromax switchers that had three matched controls were used,  
2  
3 a significant difference was shown in the combined patients group (adjusted % difference 8.3; 95%  
4  
5 CI 1.0-15.6;  $p=0.025$ ) (data not shown). In the sensitivity analysis, the adjusted percentage  
6  
7 difference was nearly 10% in the COPD group but there was a wide confidence interval (adjusted  
8  
9 % difference 9.9; 95% CI -2.4-22.2;  $p=0.114$ ). Similarly, in the asthma group, the adjusted  
10  
11 percentage difference was 6.5% (95% CI -2.7-15.7;  $p=0.168$ ). The conditional logistic regression  
12  
13 model in all matched patients showed an adjusted OR of 1.31 (95% CI 0.99-1.73;  $p=0.061$ ) for BF  
14  
15 Spiromax versus BF Turbuhaler for RDC, which did not achieve statistical significance. However,  
16  
17 in the sensitivity analysis, the OR of 1.41 was statistically significant (95% CI 1.05-1.90;  $p=0.022$ )  
18  
19 (data not shown).  
20  
21  
22

23 Secondary outcomes shown are expressed as adjusted conditional RRs (**Figure 3a**) and ORs  
24  
25 (**Figure 3b**) separately for patients with asthma and those with COPD. Among asthma patients,  
26  
27 switchers to BF Spiromax versus BF Turbuhaler reported fewer exacerbations, were less likely to  
28  
29 use high amounts of SABA daily dose, used fewer SABA inhalers, and were more likely to achieve  
30  
31 treatment stability. Among patients with COPD, no significant differences in these endpoints were  
32  
33 seen between those who switched to BF Spiromax and those staying on BF Turbuhaler.

34  
35 Confidence intervals for patients who switched to BF Spiromax show a trend effect for lower risk of  
36  
37 being on high-dose SABA therapy and reduction in use of SABA inhalers in the COPD group. In  
38  
39 the combined patients group, significance among switchers to BF Spiromax was noted in SABA  
40  
41 average daily dose (OR 0.70 [95% CI 0.53-0.94];  $p=0.017$ ), reduction in use of SABA inhalers (RR  
42  
43 0.94 [95% CI 0.89-0.99];  $p=0.012$ ), and improved treatment stability (OR 0.74 [95% CI 0.56-0.99];  
44  
45  $p=0.041$ ).  
46  
47  
48  
49

## 50 DISCUSSION

51  
52 This study, the first to compare the real-world effectiveness of switching to the BF Spiromax inhaler  
53  
54 from BF Turbuhaler found that, among 253 patients with asthma and 132 patients with COPD, BF  
55  
56 Spiromax showed non-inferiority with respect to achievement of disease control to BF Turbuhaler  
57  
58  
59

1 in matched patients with asthma and/or COPD. In the primary analysis in the combined population,  
2  
3 patients who switched to BF Spiromax had 31% higher odds of achieving RDC compared with  
4  
5 those who remained on BF Turbuhaler; however, this finding did not meet the threshold for  
6  
7 statistical significance.  
8  
9

10  
11 Patients in the asthma group who switched to BF Spiromax had significantly reduced SABA use,  
12  
13 fewer exacerbations, and greater treatment stability compared with matched patients who  
14  
15 remained on BF Turbuhaler. Some of the observed reduction in SABA use associated with BF  
16  
17 Spiromax may have arisen as a result of patients using their new device as a reliever medication in  
18  
19 addition to its use as maintenance therapy. The use of BF in a single-inhaler maintenance and  
20  
21 quick-relief therapy (SMART) regimen has been recommended as an improved method of  
22  
23 administering ICS/LABA therapy [32,33]. However, the recommendations are not device-specific;  
24  
25 as such, SABA use was not expected to differ between switchers to Spiromax and those who  
26  
27 remained on Turbuhaler. The difference may be partially explained by the greater resemblance to  
28  
29 an MDI device of Spiromax compared with Turbuhaler. No significant differences between patients  
30  
31 who switched and those who did not were observed in the COPD group. This might be partly  
32  
33 caused by lower statistical power in the COPD group, which included approximately half of the  
34  
35 number of patients as in the asthma group, and by the general notion that the reduction in  
36  
37 exacerbation frequency with ICS is less in COPD compared with asthma [34]. Another factor that  
38  
39 could have contributed is the much older age (~15 years) of patients in the COPD group. Age is a  
40  
41 proxy for many health-related characteristics, and there is evidence of a negative correlation  
42  
43 between advancing age and correct inhaler technique across MDI and varying DPI devices [35].  
44  
45

46  
47 Switching asthma medications is often necessary for several reasons, including regaining or  
48  
49 achieving asthma control or to constrain healthcare costs. Due to the retrospective design of our  
50  
51 study, reasons for switching inhaler were not captured. However, we selected BF Spiromax  
52  
53 patients registered at practices considered to have a policy of BF Spiromax adoption or wholesale  
54  
55 change. While we cannot exclude some inhaler switches being induced by clinical reasons, the  
56  
57 requirement for practices to have  $\geq 5$  patients switch to BF Spiromax within a 3-month period  
58  
59

1 means that in our view it is probable that many of the switches to BF Spiromax at these centres  
2 were driven by economic rationales. Thus, it is expected that any differences between treatments  
3 in our study result from the switch in inhalers rather than improvement in poor disease control. A  
4 switch to a different inhaler may potentially increase patient-practice contact, in terms of additional  
5 evaluation and teaching of inhaler technique, which may confound the results. However, in a pilot  
6 study which has been published only in abstract form [36], 76% of 114 patients were switched to  
7 BF Spiromax without consultation, suggesting that any confounding created by additional physician  
8 teaching for those who switched versus those remaining on original therapy was limited in the  
9 overall patient population. Indeed, previous findings have shown that most asthma patients who  
10 have had their inhaler device switched without their consent believed that cost issues were a factor  
11 [37]. As such, it is likely that many of the switches experienced by our patient cohort took place at  
12 least in part for economic reasons.  
13  
14  
15  
16  
17  
18  
19  
20  
21  
22  
23  
24  
25  
26

27 The results observed in this real-world study are consistent with previous evidence gained from  
28 RCTs where BF Spiromax was found to have similar efficacy to BF Turbuhaler.[38] The suggestion  
29 of potential superiority on secondary outcome measures in the current study, a result which was  
30 not seen in RCTs, might plausibly reflect differences in ease of use and/or adherence between the  
31 inhalers when prescribed in routine care. Patients participating in respiratory RCTs usually  
32 represent only between 1% and 5% of the true population of patients with asthma or COPD[39]  
33 and the proportion of COPD patients in primary care who would be eligible for inclusion in recent  
34 large pharmaceutically-sponsored COPD studies has ranged from 17% to 42%.[40] In addition,  
35 adherence to treatment in real-world observational studies is usually much lower than in RCTs.[41]  
36 Moreover, proper inhaler technique is often artificially high in clinical trials because of patient  
37 selection, extensive training, and close monitoring, which may explain why minimal differences in  
38 outcomes between devices have been observed in RCTs.[42] However, in daily practice, patients'  
39 differential ability to correctly use their inhaler may result in larger differences in health outcomes.  
40 Previous studies have shown that study participants and healthcare professionals find it easier to  
41 learn how to use the Spiromax inhaler correctly, compared with other DPIs.[10,11] Furthermore,  
42  
43  
44  
45  
46  
47  
48  
49  
50  
51  
52  
53  
54  
55  
56  
57  
58  
59  
60

1 patients are able to achieve slightly higher peak inspiratory flow rates with the Spiromax inhaler  
2  
3 compared with the Turbuhaler.[43]  
4  
5  
6

7 This study had clearly defined a *priori* hypothesis, endpoints, and sample size, as is recommended  
8  
9 for this type of observational research.[44] A particular strength was the non-selective patient  
10  
11 population obtained through the use of real-world data from validated databases of primary care  
12  
13 patients. The size and scope of these databases allowed for the collection of important clinical  
14  
15 variables and a sufficient follow-up period for observing relevant outcomes. In addition, the study's  
16  
17 time horizon of 1 year has minimised the impact of potential seasonal differences in disease  
18  
19 activity.[45] Overall, the study was well powered to investigate the primary outcome which was  
20  
21 RDC of disease.  
22  
23  
24

25 The inclusion of matched patients in our analysis of RDC risked introducing residual confounding  
26  
27 due to imbalanced matching ratios. We therefore performed a sensitivity analysis in the  
28  
29 subpopulation of patients in the BF Spiromax arm with exactly three matched patients in the BF  
30  
31 Turbuhaler arm. Compared with patients who remained on BF Turbuhaler, patients who switched  
32  
33 to BF Spiromax had 31% and 41% higher odds of achieving RDC in the primary analysis and  
34  
35 sensitivity analysis, respectively, with the difference reaching statistical significance in the  
36  
37 sensitivity analysis only. Regardless of whether significance was achieved, the difference in odds  
38  
39 with BF Spiromax versus BF Turbuhaler is quite similar between the primary and sensitivity  
40  
41 analyses, supporting the overall validity of our assumptions for the effect of BF Spiromax versus  
42  
43 BF Turbuhaler on achieving disease control.  
44  
45  
46

47 Limitations of the study are important to note. The use of databases to evaluate outcomes depends  
48  
49 on the information registered, which is for clinical and routine use rather than research purposes.  
50  
51 Possible issues include the fact that hospital admissions, A&E attendances, and outpatient visits  
52  
53 are not systematically recorded in primary care databases and the applied definition to identify  
54  
55 asthma-related hospital admissions or A&E events may give false positive events. However, this  
56  
57 limitation would apply equally to both groups. In addition, inhaler technique could not be taken into  
58  
59

1 account for this study as this would require close observation and communication with each patient  
2  
3 as they demonstrated their inhaler technique. Regarding the secondary outcomes, we cannot rule  
4  
5 out the possibility that the observed differences were caused by factors unrelated to the inhalers,  
6  
7 as patients who switched to BF Spiromax may have differed from non-switchers in ways not  
8  
9 captured in our data set. Comparison with other ICS/LABA FDCs would have been useful to  
10  
11 determine any differences attributable to pharmacological effect; however, there were insufficient  
12  
13 patient numbers for such comparisons. An important limitation in observational studies is the  
14  
15 potential for confounding of the associations arising from systematic differences between the  
16  
17 patients being compared. In this study, confounding was minimised where possible using matching  
18  
19 techniques to create cohorts that were comparable in terms of important demographic and clinical  
20  
21 characteristics as recommended by the Respiratory Effectiveness Group.[44] Multivariate models  
22  
23 were adjusted by those variables that continued to confound the associations of interest after  
24  
25 matching. However, in the COPD group, due to a limited number of patients, only a restricted set of  
26  
27 variables could be used for matching and model adjustment. Therefore, we cannot ensure  
28  
29 confounding of the association of interest was sufficiently addressed in this group. Furthermore, as  
30  
31 previously discussed, the selection of patients from practices which were required to have  $\geq 5$   
32  
33 switchers to BF Spiromax in a 3-month period could potentially have introduced a bias in favour of  
34  
35 practices with greater than average asthma/COPD expertise and involvement in asthma/COPD  
36  
37 patient care.

41 This real-world analysis showed that switching from BF Turbuhaler to BF Spiromax was associated  
42  
43 with no loss of symptom control and may be beneficial in some patients. These data validate, in a  
44  
45 real-world population of patients with asthma and COPD and clinical setting, similar efficacy to that  
46  
47 previously demonstrated in an RCT.[38] Such validation is important for primary practitioners as it  
48  
49 provides reassurance that BF Spiromax is effective in real-world primary care patients, and not just  
50  
51 in the carefully selected and closely monitored cohorts of patients typical of RCTs. It should  
52  
53 however be noted that periodical assessments of adherence, motivation and inhaler technique are  
54  
55 still likely to be required to ensure that optimal inhaler use is maintained long-term.[46-51] Further  
56  
57 research may be needed to assess the extent to which the results of this analysis are

1 generalisable to patients outside of the UK.  
2  
3  
4  
5  
6  
7  
8  
9  
10  
11  
12  
13  
14  
15  
16  
17  
18  
19  
20  
21  
22  
23  
24  
25  
26  
27  
28  
29  
30  
31  
32  
33  
34  
35  
36  
37  
38  
39  
40  
41  
42  
43  
44  
45  
46  
47  
48  
49  
50  
51  
52  
53  
54  
55  
56  
57  
58  
59  
60

For peer review only



## ACKNOWLEDGEMENTS

Derek Skinner, Francis Appiagyei and Tanith Hjelmbjerg of the Observational and Pragmatic Research Institute provided assistance with data analysis. Medical writing support was provided by Ian Grieve and Bill Watkins of Ashfield Healthcare Communications, part of UDG Healthcare plc, and was funded by Teva Pharmaceuticals. Teva provided a full review of the article. The authors were fully responsible for all content and editorial decisions, were involved at all stages of manuscript development, and have approved the final version.

## FUNDING

This study was supported by Teva Pharmaceuticals and undertaken by OPRI (<http://opri.sg>). Medical writing support was funded by Teva Pharmaceuticals.

## CONTRIBUTIONS

All authors (JV, NR, HB, MvdT, VC, JvB, LB, MM, DP) were involved in the conception and design of the study. JV was responsible for the analysis of the data. All authors (JV, NR, HB, MvdT, VC, JvB, LB, MM, DP) interpreted the data, were involved in development of the manuscript and completed critical reviews. All authors (JV, NR, HB, MvdT, VC, JvB, LB, MM, DP) meet the International Committee of Medical Journal Editors (ICMJE) criteria for authorship for this manuscript, take responsibility for the integrity of the work as a whole, and have given final approval to the version to be published. JV is guarantor of the study.

**COMPETING INTERESTS**

**JV** and **VC** are employees of OPRI, which has conducted paid research in respiratory disease on behalf of the following organizations in the past 5 years: Aerocrine, AKL Research and Development Ltd, Almirall, AstraZeneca, Boehringer Ingelheim, Chiesi, GlaxoSmithKline, Meda, Mundipharma, Napp, Novartis, Orion, Takeda, Teva, Zentiva (a Sanofi company).

**NR** reports grants and personal fees from BoehringerIngelheim, Novartis, and personal fees from Teva, GSK, AstraZeneca, Chiesi, Mundipharma, Cipla, Sanofi, Sandoz, 3M, Pfizer, Zambon, outside the presented work.

**HB** is an employee of Teva Pharmaceuticals

**MvdT** was an employee of Teva Pharmaceuticals Europe BV at the time the study was conducted.

**JvB** has received consultancy fees from AstraZeneca, speaker fees from Menarini, research support from GSK, Boehringer Ingelheim, Astrazeneca and Chiesi and travel support from the European COPD Coalition and the Respiratory Effectiveness Group.

**LB** has during the last three years received honoraria for to participate or to give lectures for the following companies: ALK, AstraZeneca, Boehringer, Chiesi, GlaxoSmithKlein, Novartis and Teva.

**MM** declares no relevant competing interests.

**DP** has board membership with Aerocrine, Amgen, AstraZeneca, Boehringer Ingelheim, Chiesi, Mylan, Mundipharma, Napp, Novartis, and Teva Pharmaceuticals; consultancy agreements with Almirall, Amgen, AstraZeneca, Boehringer Ingelheim, Chiesi, GlaxoSmithKline, Mylan, Mundipharma, Napp, Novartis, Pfizer, Teva Pharmaceuticals, and Theravance; grants and unrestricted funding for investigator-initiated studies (conducted through Observational and Pragmatic Research Institute Pte Ltd) from Aerocrine, AKL Research and Development Ltd, AstraZeneca, Boehringer Ingelheim, British Lung Foundation, Chiesi, Mylan, Mundipharma, Napp, Novartis, Pfizer, Respiratory Effectiveness Group, Teva Pharmaceuticals, Theravance, UK National Health Service, Zentiva; payment for lectures/speaking engagements from Almirall, AstraZeneca, Boehringer Ingelheim, Chiesi, Cipla, GlaxoSmithKline, Kyorin, Mylan, Merck, Mundipharma, Novartis, Pfizer, Skyepharma, and Teva Pharmaceuticals; payment for manuscript preparation from Mundipharma and Teva Pharmaceuticals; payment for the development of educational materials from Mundipharma and Novartis; payment for travel/accommodation/meeting

1 expenses from Aerocrine, AstraZeneca, Boehringer Ingelheim, Mundipharma, Napp, Novartis, and  
2  
3 Teva Pharmaceuticals; funding for patient enrolment or completion of research from Chiesi,  
4  
5 Novartis, Teva Pharmaceuticals, and Zentiva; stock/stock options from AKL Research and  
6  
7 Development Ltd which produces phytopharmaceuticals; owns 74% of the social enterprise  
8  
9 Optimum Patient Care Ltd (Australia, Singapore, and UK) and 74% of Observational and  
10  
11 Pragmatic Research Institute Pte Ltd (Singapore); and is peer reviewer for grant committees of the  
12  
13 Efficacy and Mechanism Evaluation programme, and Health Technology Assessment.  
14  
15

## 16 17 **DATA SHARING STATEMENT**

18 All relevant data are within the paper and its Supporting Information files. The dataset supporting  
19  
20 the conclusions of this article was derived from the Clinical Practice Research Datalink  
21  
22 (www.cprd.com) and the UK Optimum Patient Care Research Database (www.opcrd.co.uk). We do  
23  
24 not have permission to give public access to these databases; however, researchers may request  
25  
26 access for their own purposes. The CPRD has broad National Research Ethics Service Committee  
27  
28 (NRES) ethics approval for purely observational research using the primary care data and  
29  
30 established data linkages. The OPCRd has ethical approval from the National Health Service  
31  
32 (NHS) Research Authority to hold and process anonymized research data (Research Ethics  
33  
34 Committee reference: 15/EM/0150). This study was approved by the Anonymised Data Ethics  
35  
36 Protocols and Transparency (ADEPT) committee (reference ADEPT0816) – the independent  
37  
38 scientific advisory committee for the OPCRd, commissioned by the Respiratory Effectiveness  
39  
40 Group, and the Independent Scientific Advisory Committee (ISAC) for the CPRD (registration  
41  
42 number, 16\_086). The study was designed, implemented, and registered in accordance with the  
43  
44 criteria of the European Network of Centres for Pharmacoepidemiology and Pharmacovigilance  
45  
46 (ENCEPP/SDPP/13238).  
47  
48  
49  
50  
51  
52  
53  
54  
55  
56  
57  
58  
59  
60

## REFERENCES

- 1 Masoli M, Fabian D, Holt S, et al. The global burden of asthma: executive summary of the GINA Dissemination Committee report. *Allergy* 2004;59:469–78.
- 2 Adeloye D, Chua S, Lee C, et al. Global and regional estimates of COPD prevalence: Systematic review and meta-analysis. *J Glob Health* 2015;5(2):020415.
- 3 Global Initiative for Asthma. 2017 Report. <http://ginasthma.org/wp-content/uploads/2016/01/wms-GINA-2017-main-report-tracked-changes-for-archive.pdf> (accessed 29 May 2018).
- 4 Vogelmeier CF, Criner GJ, Martínez FJ, et al. Global Strategy for the Diagnosis, Management, and Prevention of Chronic Obstructive Lung Disease 2017 Report: GOLD Executive Summary. *Eur Respir J* 2017;49:1700214.
- 5 Lavorini F, Magnan A, Dubus JC, et al. Effect of incorrect use of dry powder inhalers on management of patients with asthma and COPD. *Respir Med* 2008;102(4):593–604.
- 6 Al-Jahdali H, Ahmed A, Al-Harbi A, et al. Improper inhaler technique is associated with poor asthma control and frequent emergency department visits. *Allergy Asthma Clin Immunol.* 2013;9(1):8.
- 7 Price DB, Roman-Rodriguez M, McQueen RB, et al. Inhaler errors in the CRITIKAL study: Type, frequency, and association with asthma outcomes. *J Allergy Clin Immunol Pract* 2017;5:1071–81.
- 8 Canonica GW, Keegstra JR, Chrystyn H. Spiromax, a new dry powder inhaler: dose consistency under simulated real-world conditions. *J Aerosol Med Pulm Drug Deliv* 2015;28(5):309–19.
- 9 Chrystyn H, Safioti G, Keegstra JR, et al. Effect of inhalation profile and throat geometry on predicted lung deposition of budesonide and formoterol (BF) in COPD: An in-vitro comparison of Spiromax with Turbuhaler. *Int J Pharm.* 2015;491(1–2):268–76.
- 10 Sandler N, Holländer J, Långström D, et al. Evaluation of inhaler technique handling-errors, inhaler perception and preference with Spiromax, Easyhaler and Turbuhaler devices among healthy Finnish volunteers: a single site, single visit crossover study (Finhaler). *BMJ Open Resp Res* 2016;3:e000119.
- 11 Bosnic-Anticevich S, Callan C, Chrystyn H, et al. Inhaler technique mastery and maintenance in healthcare professionals trained on different devices. *J Asthma* 2017;55(1):79–88.
- 12 Weisfeld L, Gopalan G, Shu Y, Baconnet B, Shah T. Pharmacokinetics (PK) and safety of budesonide plus formoterol (BF) (160/4.5mcg) Spiromax® and BF (200/6mcg) Turbuhaler®

- 1 following two inhalations (+/–charcoal [char] block) in healthy volunteers (HV). *Eur Resp J*  
2 2013a;42 (Suppl 57):P712.  
3
- 4 13 Weisfeld L, Gopalan G, Shu Y, Baconnet B, Shah T. Pharmacokinetics (PK) and safety of  
5 budesonide plus formoterol (BF) (320/9mcg) Spiromax<sup>®</sup> and BF (400/12mcg) Turbuhaler<sup>®</sup>  
6 following two inhalations (+/–charcoal [char] block) in healthy volunteers (HV). *Eur Resp J*  
7 2013b;42(Suppl 57):4630.  
8
- 9 14 Cazzola M, Ora J, Di Paolo A, et al. Onset of action of budesonide/formoterol Spiromax<sup>®</sup>  
10 compared with budesonide/formoterol Turbuhaler<sup>®</sup> in patients with COPD. *Pulm*  
11 *Pharmacol Ther* 2016;39:48–53.  
12
- 13 15 Optimum Patient Care Research Database (OPCRD).  
14 <http://optimumpatientcare.org/database-overview/> (accessed 29 May 2018).  
15
- 16 16 Clinical Practice Research Datalink. <https://www.cprd.com/home/> (accessed 29 May  
17 2018).  
18
- 19 17 Respiratory Effectiveness Group. <http://effectivenessevaluation.org/about-us/> (accessed  
20 29 May 2018).  
21
- 22 18 European Network of Centres for Pharmacoepidemiology and Pharmacovigilance.  
23 <http://www.encepp.eu/> (accessed 29 May 2018).  
24
- 25 19 NHS Digital. Read codes. <https://digital.nhs.uk/article/1104/Read-Codes> (accessed 29  
26 May 2018).  
27
- 28 20 Price D, Martin RJ, Barnes N, et al. Prescribing practices and asthma control with  
29 hydrofluoroalkane-beclomethasone and fluticasone: a real-world observational study. *J*  
30 *Allergy Clin Immunol* 2010;126:511–8.  
31
- 32 21 Price D, Colice G, Israel E, et al. Add-on LABA in a separate inhaler as asthma step-up  
33 therapy versus increased dose of ICS or ICS/LABA combination inhaler. *ERJ Open Res*  
34 2016;2(2):00106–2015.  
35
- 36 22 Price D, Thomas V, von Ziegenweidt J, et al. Switching patients from other inhaled  
37 corticosteroid devices to the Easyhaler<sup>®</sup>: historical, matched-cohort study of real-life  
38 asthma patients. *J Asthma Allergy* 2014;7:31–51.  
39
- 40 23 Price D, Small I, Haughney J, et al. Clinical and cost effectiveness of switching asthma  
41 patients from fluticasone-salmeterol to extra-fine particle beclometasone-formoterol: a  
42 retrospective matched observational study of real-world patients. *Prim Care Respir J*  
43 2013;22:439–48.  
44
- 45 24 Reddel HK, Taylor DR, Bateman ED, et al. An official American Thoracic  
46 Society/European Respiratory Society statement: asthma control and exacerbations:  
47  
48  
49  
50  
51  
52  
53  
54  
55  
56  
57  
58  
59

- 1 standardizing endpoints for clinical asthma trials and clinical practice. *Am J Respir Crit*  
2 *Care Med* 2009;180(1):59–99.
- 3
- 4 25 Hagedorn C, Kassner F, Banik N, Ntampakas P, Fielder K. Influence of  
5 salmeterol/fluticasone via single versus separate inhalers on exacerbations in severe/very  
6 severe COPD. *Respir Med* 2013;107(4):542–9.
- 7
- 8
- 9 26 Israel E, Roche N, Martin RJ, et al. Increased dose of inhaled corticosteroid versus add-  
10 on long-acting beta-agonist for step-up therapy in asthma. *Ann Am Thor Soc*  
11 2015;12(6):798–806.
- 12
- 13
- 14 27 Stuart EA, Ialongo NS. Matching methods for selection of subjects for follow-up.  
15 *Multivariate Behav Res* 2010;45(4):746–65.
- 16
- 17 28 Rosenbaum PR, Rubin DB. Constructing a control group using multivariate matched  
18 sampling methods that incorporate the propensity score. *The American Statistician*  
19 1985;39:33–8.
- 20
- 21
- 22 29 Austin PC. An introduction to propensity score methods for reducing the effects of  
23 confounding in observational studies. *Multivariate Behav Res* 2011;46(3):399–424.
- 24
- 25
- 26 30 Huitfeldt B, Hummel J, European Federation of Statisticians in the Pharmaceutical I. The  
27 draft FDA guideline on non-inferiority clinical trials: a critical review from European  
28 pharmaceutical industry statisticians. *Pharm Stat* 2011;10(5):414–9.
- 29
- 30
- 31 31 Chapman KR, Bergeron C, Bhutani M, et al. Do we know the minimal clinically important  
32 difference (MCID) for COPD exacerbations? *COPD* 2013;10(2):243–9.
- 33
- 34 32 Chapman KR, et al. Single maintenance and reliever therapy (SMART) of asthma: a  
35 critical appraisal. *Thorax* 2010 Aug;65:747–52.
- 36
- 37
- 38 33 Thomas M, et al. Single inhaler maintenance and reliever therapy (SMART) in general  
39 practice asthma management: where are we? *Prim Care Respir J* 2012;21:8–10.
- 40
- 41 34 Calverley PM. Effect of corticosteroids on exacerbations of asthma and chronic  
42 obstructive pulmonary disease. *Proc Am Thorac Soc* 2004;1:161–6.
- 43
- 44 35 Barbara S, et al. Inhaler technique: does age matter? A systematic review. *Eur Respir*  
45 *Rev* 2017;6:26.
- 46
- 47 36 Benhaddi H, et al. Real-life effectiveness of budesonide/formoterol for the management of  
48 asthma and COPD. *Eur Respir J* 2016;48:PA627.
- 49
- 50 37 Doyle S, et al. What happens to patients who have their asthma device switched without  
51 their consent? *Prim Care Respir J* 2010;19:131–9.
- 52
- 53 38 Virchow JC, Rodriguez-Roisin R, Papi A, Shah TP, Gopalan G. A randomized, double-  
54 blinded, double-dummy efficacy and safety study of budesonide-formoterol Spiromax®
- 55
- 56
- 57
- 58
- 59
- 60

- 1 compared to budesonide-formoterol Turbuhaler® in adults and adolescents with persistent  
2 asthma. *BMC Pulm Med*. 2016;16:42.  
3
- 4 39 Herland K, Akselsen JP, Skjønberg OH, Bjermer L. How representative are clinical study  
5 patients with asthma or COPD for a larger “real life” population of patients with obstructive  
6 lung disease. *Respir Med* 2005;99:11–9.  
7
- 8 40 Kruis AL, Stallberg B, Jones RCM, et al. Primary care COPD patients compared with  
9 large pharmaceutically-sponsored COPD studies: An UNLOCK validation study. *PLOS*  
10 *One* 2014;9(3)e90145.  
11
- 12 41 Price D, Brusselle G, Roche N, Freeman D, Chisholm A. Real-world research and its  
13 importance in respiratory medicine. *Breathe (Sheffield, England)* 2015;11(1):26–38.  
14
- 15 42 Dolovich MB, Ahrens RC, Hess DR, et al. Device selection and outcomes of aerosol  
16 therapy: Evidence-based guidelines: American College of Chest Physicians/American  
17 College of Asthma, Allergy, and Immunology. *Chest* 2005;127(1):335–71.  
18
- 19 43 Azouz W, Chetcuti P, Hosker H, Saralaya D, Chrystyn H. Inhalation characteristics of  
20 asthma patients, COPD patients and healthy volunteers with the Spiromax® and  
21 Turbuhaler® devices: a randomised, cross-over study. *BMC Pulm Med* 2015;15:47.  
22
- 23 44 Roche N, Reddel H, Martin R, et al. Quality standards for real-world research: Focus on  
24 observational database studies of comparative effectiveness. *Ann Am Thorac Soc*  
25 2014;11(Suppl. 2):S99–104.  
26
- 27 45 Jenkins CR, Celli B, Anderson JA, et al. Seasonality and determinants of moderate and  
28 severe COPD exacerbations in the TORCH study. *Eur Resp J*. 2012;39(1):38–45.  
29
- 30 46 Broeders ME, Sanchis S, Levy ML, et al. The ADMIT series—issues in inhalation therapy.  
31 2. Improving technique and clinical effectiveness. *Prim Care Respir J* 2009;18(2):76–82.  
32
- 33 47 Ovchinnikova L, Smith L, Bosnic-Anticevich S. Inhaler technique maintenance: gaining an  
34 understanding from the patient’s perspective. *J Asthma* 2011;48:616–24.  
35
- 36 48 Bosnic-Anticevich SZ, Sinha H, So S, et al. Metered-dose inhaler technique: the effect of  
37 two educational interventions delivered in community pharmacy over time. *J Asthma*  
38 2010;47:251–6.  
39
- 40 49 Crane MA, Jenkins CR, Goeman DP, et al. Inhaler device technique can be improved in  
41 older adults through tailored education: findings from a randomised controlled trial. *NPJ*  
42 *Prim Care Respir Med* 2014;24:14034.  
43
- 44 50 Klijn SL, Hiligsmann M, Evers SMAA, et al. Effectiveness and success factors of  
45 educational inhaler technique interventions in asthma and COPD patients: a systematic  
46 review. *NPJ Prim Care Respir Med* 2017;27:24.  
47  
48  
49  
50  
51  
52  
53  
54  
55  
56  
57  
58  
59  
60

1  
2  
3  
4  
5  
6  
7  
8  
9  
10  
11  
12  
13  
14  
15  
16  
17  
18  
19  
20  
21  
22  
23  
24  
25  
26  
27  
28  
29  
30  
31  
32  
33  
34  
35  
36  
37  
38  
39  
40  
41  
42  
43  
44  
45  
46  
47  
48  
49  
50  
51  
52  
53  
54  
55  
56  
57  
58  
59  
60

51 Greenland S. Modeling and variable selection in epidemiologic analysis. *Am J Publ Health* 1989;79:340–9.

For peer review only



## Figure legends

**Figure 1.** Patient flow diagram (prior to matching)

**Figure 2.** Frequency of achievement of RDC in patients switching to BF Spiromax and those continuing on BF Turbuhaler

**Figure 3.** Clinical outcomes expressed as adjusted conditional (A) rate ratios (95% CI) and (B) odds ratios (95% CI), among patients switching to BF Spiromax versus continuing on BF Turbuhaler in the matched analysis. \*Model did not converge in the asthma group.

For peer review only

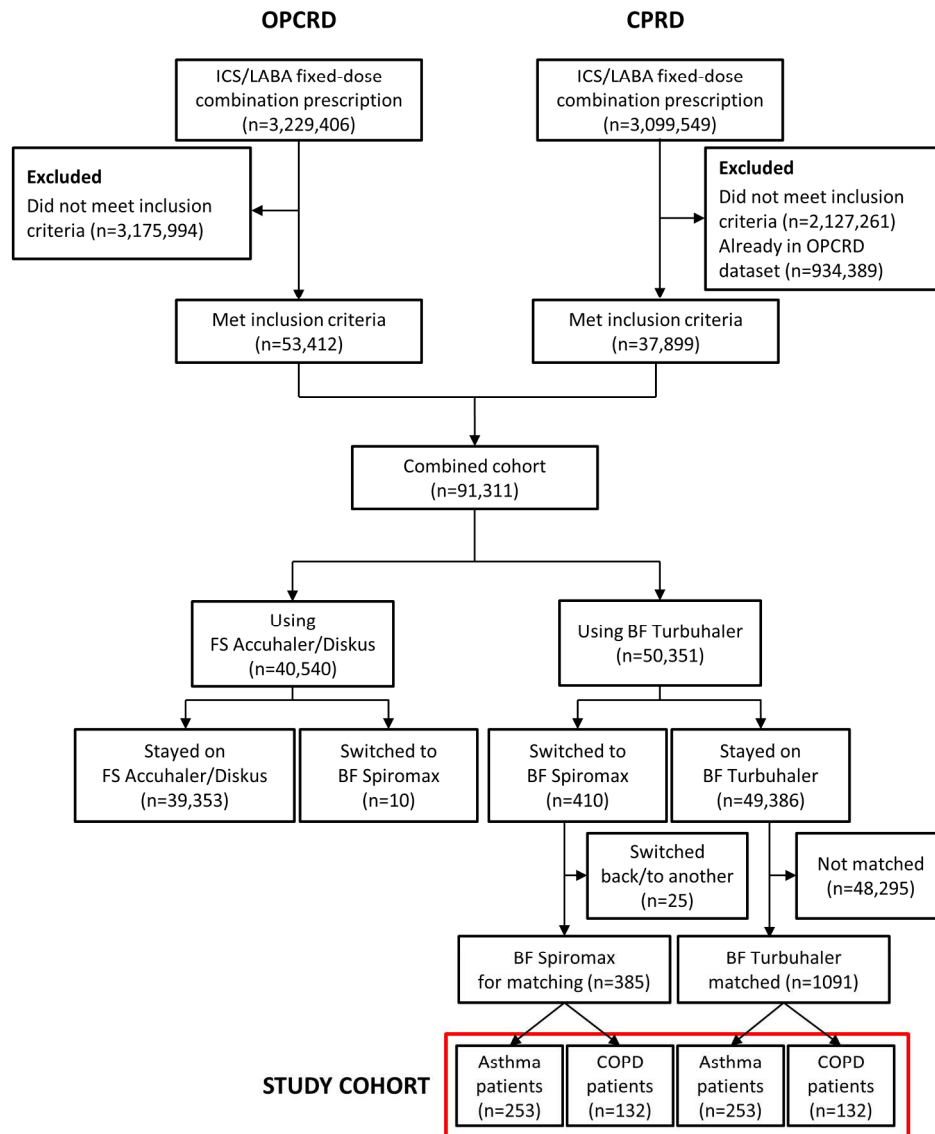

Figure 1. Patient flow diagram (prior to matching)

180x230mm (300 x 300 DPI)



Frequency of achievement of RDC in patients switching to BF Spiromax and those continuing on BF Turbuhaler

120x58mm (300 x 300 DPI)

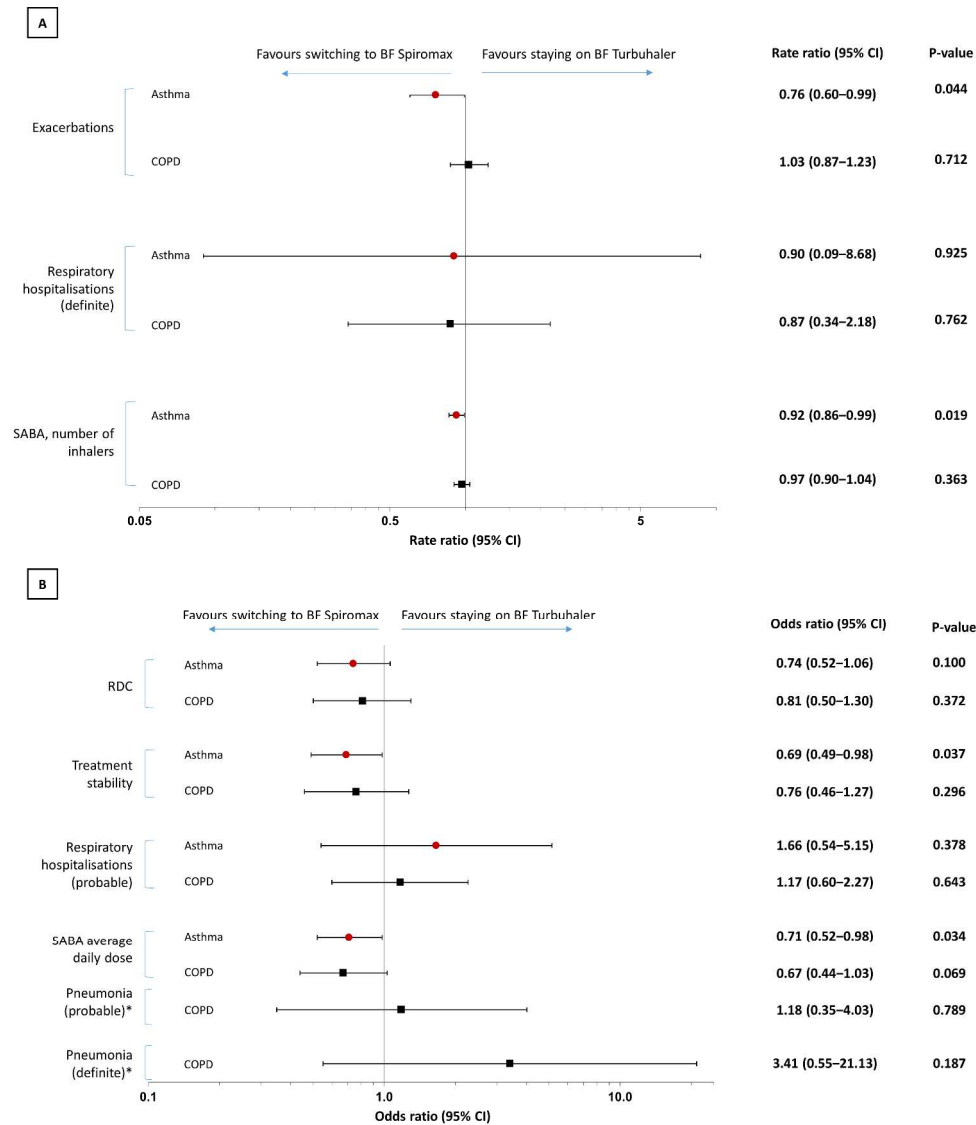

Clinical outcomes expressed as adjusted conditional (A) rate ratios (95% CI) and (B) odds ratios (95% CI), among patients switching to BF Spiromax versus continuing on BF Turbuhaler in the matched analysis.

\*Model did not converge in the asthma group.

338x399mm (300 x 300 DPI)

## Supplementary Methods

### Matching

Matching was done using the most relevant confounders of the association between the treatment (BF Spiromax vs. BF Turbuhaler) and the primary outcome (achieving risk domain control [RDC]).

Confounders that are unbalanced between the treatment arms can bias associations of interest between the treatment arms and the outcomes. Potential confounders were identified based on a combination of baseline imbalance, bias potential in relation to the primary outcome, as well as expert judgement. Through this, the most relevant confounders were used for direct matching. As it is necessary to limit the number of variables used for direct matching to avoid overly restricting the patient population, variables that do not relevantly affect the association of interest were excluded.

After matching, this approach was repeated in the matched sample to identify any residual confounding, selecting confounders for direct adjustment in the outcome analyses.

### Baseline balance

Together with the baseline characterisation, the difference between the arms was quantified using the standardized mean difference (SMD). This measure is not affected by the number of observations in a sample, gives the size of the difference, and, thus, is a better way to judge imbalance than a P-value of a hypothesis test of difference. The SMD was calculated as described below. A SMD of  $\leq 10\%$  was taken as sufficient balance between the arms.

### Formulae for standardised difference

Continuous covariate:

$$SDD = \frac{(\bar{x}_t - \bar{x}_r)}{\sqrt{\frac{s_t^2 + s_r^2}{2}}}$$

where  $\bar{x}_t$ ,  $\bar{x}_r$  denote the sample means and  $s_t, s_r$  the standard deviations

Binary Covariate:

$$SDD = \frac{(\hat{p}_t - \hat{p}_r)}{\sqrt{\frac{\hat{p}_t(1-\hat{p}_t) + \hat{p}_r(1-\hat{p}_r)}{2}}}$$

where  $\hat{p}_t, \hat{p}_r$  denote the proportion of patients in each category

Categorical (>2 categories) Covariate:

$$SDD = \sqrt{(T - C)'S^{-1}(T - C)}$$

where  $S$  is a  $(k - 1) \times (k - 1)$  covariance matrix:

$$S = [S_{kl}] = \begin{cases} \frac{\hat{p}_{1k}(1 - \hat{p}_{1k}) + \hat{p}_{2k}(1 - \hat{p}_{2k})}{2}, & k = l \\ \frac{\hat{p}_{1k}\hat{p}_{1l} + \hat{p}_{2k}\hat{p}_{2l}}{2}, & k \neq l \end{cases}$$

, =  $(\hat{p}_{12}, \dots, \hat{p}_{1k})'$ ,  $C = (\hat{p}_{22}, \dots, \hat{p}_{2k})'$  and  $\hat{p}_{jk} = P(\text{category } k | \text{treatment arm } j)$ ,  $j = 1, 2$ ,  $k = 2, 3, \dots, k$

### *Bias potential*

Bias potential assesses the degree to which the observed association between the exposure of interest and the outcome is affected by conditioning on another variable. It is also called change-in-estimate. In the case of the primary outcome, a binary indicator for achieving RDC, the definition of bias potential was:

$$\text{Bias potential} = \text{abs}(1 - e^{(\beta_{\text{crude}} - \beta_{\text{adjusted}})})$$

where  $\beta_{\text{crude}} = \ln(\text{OR})$  (=natural log of the odds ratio) of exposure from the model without the covariate and  $\beta_{\text{adjusted}} = \ln(\text{OR})$  of exposure after adding the covariate to the model. It is called *bias potential* since the bias was estimated without other covariates in the model. To what extent a variable introduces bias into a model will depend on the total model.

A bias potential of  $\geq 2\%$  was considered to indicate a relevant change in the association between the outcome and exposure. Often a cut-off of 5% or even 10% is used to select confounders during model building [44], but a more sensitive cut-off was applied for this study.

The baseline variables with the highest bias potential, that were also insufficiently balanced (SMD  $> 10\%$ ), were presented to a panel of clinical experts for the final selection of variables to use for matching.

### *Matching process*

Exact matching for categorical variables and matching within a maximum calliper (maximum distance allowed between a case and a control) for continuous variables was used to match patients, using nearest neighbour variable mixed matching with a match maximum of 3:1 without replacement. Patients in the asthma and COPD groups were matched separately with disease-specific matching criteria.

Mixed matching is a process that utilises more of the data by matching varying numbers of control arm patients to a treatment arm patient. In other words, there will be a cohort of unique patients matched 1:1, another cohort of unique patients matched 2:1, and a third cohort of unique patients matched 3:1. The analyses were conducted using all the matched patients even though some patients had 1 matched control while other patients had 3 matched controls. This imbalance in number of controls matched to cases could introduce residual confounding. Therefore, we verified our assumption that this would not affect the study outcomes through a sensitivity analysis, in which the outcome analyses were also undertaken in the subpopulation of patients in the BF Spiromax arm with exactly 3 matched patients in the BF Turbuhaler arm.

Although the patients in the BF Turbuhaler arm could have multiple records per patient to optimise

1  
2 the matching process, only one record per patient contributed to the matching.  
3

4 Matching was repeated 20 times with a different random patient sequence to select the run that  
5 resulted in the highest number of matched patients.  
6  
7

8 Missing data were treated as random and were not imputed. If a selected confounder had more than  
9 20% of missing data, it was not considered as a potential matching variable. If the proportion of  
10 missing data was below 20%, the variable was encoded into a categorical variable, adding a  
11 category for the observations with missing values, enabling this variable to be used for matching.  
12  
13  
14  
15  
16

### 17 *Post-matching evaluation*

18  
19 The quality of the matching was evaluated using the same methods used to identify the confounders:  
20 standardised difference in combination with bias potential.  
21  
22

23 To minimise the number of covariates used to adjust the outcome model, a forward assessment of  
24 bias potential was used. The identified confounders were entered one-by-one, and the relative  
25 change in the effect size of exposure was assessed against the effect size before introducing the  
26 variable. If the relative change in effect size was  $\geq 0.02$ , the variables remained in the model, and the  
27 next one was evaluated.  
28  
29  
30  
31  
32  
33  
34  
35  
36  
37  
38  
39  
40  
41  
42  
43  
44  
45  
46  
47  
48  
49  
50  
51  
52  
53  
54  
55  
56  
57  
58  
59  
60

Supplementary Table 1. Patient characteristics in unmatched analysis

| Variable                                 | Asthma                 |                                |         |      | COPD                      |                                |         |      |
|------------------------------------------|------------------------|--------------------------------|---------|------|---------------------------|--------------------------------|---------|------|
|                                          | BF Spiromax<br>(n=265) | BF<br>Turbuhaler<br>(n=32,071) | P-Value | SMD  | BF<br>Spiromax<br>(n=155) | BF<br>Turbuhaler<br>(n=17,315) | P-Value | SMD  |
| <b>Mean (SD) age, years</b>              | 56.3 (15.5)            | 50.4 (17.4)                    | <0.0001 | 12.1 | 70.2 (9.1)                | 69.9 (11.0)                    | 0.0109  | 3.5  |
| <b>Males, n (%)</b>                      | 121 (45.7)             | 13,520 (42.2)                  | <0.0001 | 5.5  | 77 (49.7)                 | 9,198 (53.1)                   | 0.5883  | 0.6  |
| <b>Body mass index, n (%)</b>            |                        |                                |         |      |                           |                                |         |      |
| <18.5 kg/m <sup>2</sup>                  | 4 (1.6)                | 395 (1.3)                      | <0.0001 | 5.2  | 7 (4.6)                   | 725 (4.2)                      | 0.0001  | 5.3  |
| ≥18.5 to <25 kg/m <sup>2</sup>           | 68 (27.2)              | 8,604 (27.8)                   |         |      | 48 (31.8)                 | 5,480 (32.0)                   |         |      |
| ≥25 to <30 kg/m <sup>2</sup>             | 89 (35.6)              | 10,614 (34.3)                  |         |      | 50 (33.1)                 | 5,685 (33.2)                   |         |      |
| ≥30 kg/m <sup>2</sup>                    | 89 (35.6)              | 11,325 (36.6)                  |         |      | 46 (30.5)                 | 5,239 (30.6)                   |         |      |
| <b>Smoking status, n (%)</b>             |                        |                                |         |      |                           |                                |         |      |
| Non-smoker                               | 129 (49.6)             | 17,291 (54.2)                  | 0.1366  | 2.0  | 18 (11.6)                 | 2,518 (14.6)                   | <0.0001 | 10.7 |
| Current smoker                           | 47 (18.1)              | 5,736 (18.0)                   |         |      | 42 (27.1)                 | 4,948 (28.7)                   |         |      |
| Ex-smoker                                | 84 (32.3)              | 8,857 (27.8)                   |         |      | 95 (61.3)                 | 9,800 (56.8)                   |         |      |
| <b>Comorbidities, n (%)</b>              |                        |                                |         |      |                           |                                |         |      |
| Ischaemic heart disease                  | 15 (5.7)               | 1,945 (6.1)                    | <0.0001 | 8.5  | 29 (18.7)                 | 3,771 (21.8)                   | 0.0021  | 3.4  |
| Heart failure                            | 1 (0.4)                | 338 (1.1)                      | <0.0001 | 5.7  | 5 (3.2)                   | 1,115 (6.4)                    | 0.0228  | 2.2  |
| Diabetes                                 | 21 (7.9)               | 2,297 (7.2)                    | <0.0001 | 8.5  | 20 (12.9)                 | 2,533 (14.6)                   | 0.0273  | 2.6  |
| Probable pneumonia                       | 1 (0.4)                | 136 (0.4)                      | 0.6341  | 0.9  | 2 (1.3)                   | 298 (1.7)                      | 0.0023  | 3.5  |
| GERD                                     | 41 (15.5)              | 3,896 (12.1)                   | 0.0001  | 3.8  | 25 (16.1)                 | 2,709 (15.6)                   | 0.0030  | 3.5  |
| Rhinitis                                 | 63 (23.8)              | 6,341 (19.8)                   | 0.2007  | 0.8  | 17 (11.0)                 | 1,544 (8.9)                    | <0.0001 | 7.2  |
| <b>Charlson Comorbidity Index, n (%)</b> |                        |                                |         |      |                           |                                |         |      |
| 0                                        | 74 (27.9)              | 10,394 (32.4)                  | <0.0001 | 8.1  | 102 (65.8)                | 10,018 (57.9)                  | 0.0002  | 4.3  |
| 1–4                                      | 164 (61.9)             | 19,749 (61.6)                  |         |      | 37 (23.9)                 | 5,220 (30.1)                   |         |      |
| ≥5                                       | 27 (10.2)              | 1,928 (6.0)                    |         |      | 16 (10.3)                 | 2,077 (12.0)                   |         |      |
| <b>Drug therapy, n (%)</b>               |                        |                                |         |      |                           |                                |         |      |
| ICS+LABA                                 | 225 (84.9)             | 26,879 (83.8)                  | <0.0001 | 13.0 | 38 (24.5)                 | 6,987 (40.4)                   | <0.0001 | 21.7 |
| ICS+LABA+LAMA                            | 11 (4.2)               | 615 (1.9)                      |         |      | 108 (69.7)                | 9,244 (53.4)                   |         |      |
| ICS+LABA+LAMA+LTRA                       | 4 (1.5)                | 298 (0.9)                      |         |      | 8 (5.2)                   | 625 (3.6)                      |         |      |
| ICS+LABA+LTRA                            | 25 (9.4)               | 4,278 (13.3)                   |         |      | 1 (0.6)                   | 459 (2.7)                      |         |      |
| Other                                    | 0 (0.0)                | 1 (0.0)                        |         |      | 0 (0.0)                   | 0 (0.0)                        |         |      |



|                                                     |            |               |         |      |           |              |         |       |
|-----------------------------------------------------|------------|---------------|---------|------|-----------|--------------|---------|-------|
| <b>SABA average daily dose, n (%)</b>               |            |               |         |      |           |              |         |       |
| 0                                                   | 65 (27.2)  | 9,929 (34.2)  | <0.0001 | 1.4  | 27 (18.4) | 3,927 (25.7) | 0.0003  | 4.8   |
| >0 to ≤200 µg*                                      | 74 (31.0)  | 8,268 (28.4)  |         |      | 23 (15.6) | 3,109 (20.4) |         |       |
| >200 to ≤400 µg*                                    | 57 (23.8)  | 6,576 (22.6)  |         |      | 37 (25.2) | 3,487 (22.8) |         |       |
| >400 to ≤600 µg*                                    | 27 (11.3)  | 2,237 (7.7)   |         |      | 32 (21.8) | 2,524 (16.5) |         |       |
| >600 µg*                                            | 16 (6.7)   | 2,058 (7.1)   |         |      | 28 (19.0) | 2,215 (14.5) |         |       |
| <b>ICS average daily dose, n (%)</b>                |            |               |         |      |           |              |         |       |
| ≤400 µg <sup>†</sup>                                | 113 (42.6) | 17,184 (53.6) | <0.0001 | 77.9 | 33 (21.3) | 5,886 (34.0) | <0.0001 | 150.1 |
| >400 to ≤800 µg <sup>†</sup>                        | 103 (38.9) | 10,701 (33.4) |         |      | 77 (49.7) | 7,369 (42.6) |         |       |
| >800 to ≤1600 µg <sup>†</sup>                       | 44 (16.6)  | 3,772 (11.8)  |         |      | 41 (26.5) | 3,497 (20.2) |         |       |
| >1600 µg <sup>†</sup>                               | 5 (1.9)    | 414 (1.3)     |         |      | 4 (2.6)   | 563 (3.3)    |         |       |
| <b>No. of exacerbations in baseline year, n (%)</b> |            |               |         |      |           |              |         |       |
| 0                                                   | 203 (76.6) | 23,095 (72.0) | <0.0001 | 16.4 | 59 (38.1) | 6,477 (37.4) | <0.0001 | 9.9   |
| 1                                                   | 45 (17.0)  | 5,503 (17.2)  |         |      | 46 (29.7) | 4,381 (25.3) |         |       |
| 2                                                   | 12 (4.5)   | 2,108 (6.6)   |         |      | 16 (10.3) | 2,772 (16.0) |         |       |
| ≥3                                                  | 5 (1.9)    | 1365 (4.3)    |         |      | 34 (21.9) | 3,685 (21.3) |         |       |
| <b>Disease control using RDC, n (%)</b>             | 184 (69.4) | 19,082 (59.5) | <0.0001 | 8.7  | 59 (38.1) | 6,477 (37.4) | <0.0001 | 7.6   |

\*Salbutamol equivalents; <sup>†</sup>Beclomethasone equivalents.

P-value = p-value for the Kruskal-Wallis equality-of-populations rank test, or the Pearson's chi-square test of independent categories, where appropriate

BF, budesonide/formoterol; GERD, gastroesophageal reflux disease; ICS, inhaled corticosteroid; LABA, long-acting  $\beta_2$ -agonist; LAMA, long-acting muscarinic antagonist; LTRA, leukotriene receptor antagonist; RDC, risk domain control; SABA, short-acting  $\beta_2$ -agonist; SD, standard deviation; SMD, standardized mean difference

Voorham J, et al. [bmjopen-2018-022051](https://doi.org/10.1136/bmjopen-2018-022051): Real-world effectiveness evaluation of budesonide/formoterol Spiromax® for the management of asthma and chronic obstructive pulmonary disease in the United Kingdom

STROBE checklist of items that should be included in reports of observational studies

|                           | Item No | Recommendation                                                                                                                                                                                                                                                                                                                                                                                                                                                                                                                                                                                                                                                                                                                                            |
|---------------------------|---------|-----------------------------------------------------------------------------------------------------------------------------------------------------------------------------------------------------------------------------------------------------------------------------------------------------------------------------------------------------------------------------------------------------------------------------------------------------------------------------------------------------------------------------------------------------------------------------------------------------------------------------------------------------------------------------------------------------------------------------------------------------------|
| <b>Title and abstract</b> | 1       | (a) Indicate the study's design with a commonly used term in the title or the abstract – <a href="#">The title states that the study is a real-world effectiveness evaluation (Page 1)</a><br>(b) Provide in the abstract an informative and balanced summary of what was done and what was found – <a href="#">Page 2</a>                                                                                                                                                                                                                                                                                                                                                                                                                                |
| <b>Introduction</b>       |         |                                                                                                                                                                                                                                                                                                                                                                                                                                                                                                                                                                                                                                                                                                                                                           |
| Background/rationale      | 2       | Explain the scientific background and rationale for the investigation being reported – <a href="#">Pages 4 and 5</a>                                                                                                                                                                                                                                                                                                                                                                                                                                                                                                                                                                                                                                      |
| Objectives                | 3       | State specific objectives, including any prespecified hypotheses – <a href="#">Page 5</a>                                                                                                                                                                                                                                                                                                                                                                                                                                                                                                                                                                                                                                                                 |
| <b>Methods</b>            |         |                                                                                                                                                                                                                                                                                                                                                                                                                                                                                                                                                                                                                                                                                                                                                           |
| Study design              | 4       | Present key elements of study design early in the paper – <a href="#">Pages 5 and 6</a>                                                                                                                                                                                                                                                                                                                                                                                                                                                                                                                                                                                                                                                                   |
| Setting                   | 5       | Describe the setting, locations, and relevant dates, including periods of recruitment, exposure, follow-up, and data collection – <a href="#">Pages 5 and 6</a>                                                                                                                                                                                                                                                                                                                                                                                                                                                                                                                                                                                           |
| Participants              | 6       | (a) <i>Cohort study</i> —Give the eligibility criteria, and the sources and methods of selection of participants. Describe methods of follow-up – <a href="#">Pages 5–7</a><br><i>Case-control study</i> —Give the eligibility criteria, and the sources and methods of case ascertainment and control selection. Give the rationale for the choice of cases and controls<br><i>Cross-sectional study</i> —Give the eligibility criteria, and the sources and methods of selection of participants<br>(b) <i>Cohort study</i> —For matched studies, give matching criteria and number of exposed and unexposed – <a href="#">Pages 8–10</a><br><i>Case-control study</i> —For matched studies, give matching criteria and the number of controls per case |
| Variables                 | 7       | Clearly define all outcomes, exposures, predictors, potential confounders, and effect modifiers. Give diagnostic criteria, if applicable – <a href="#">Page 7</a>                                                                                                                                                                                                                                                                                                                                                                                                                                                                                                                                                                                         |
| Data sources/measurement  | 8*      | For each variable of interest, give sources of data and details of methods of assessment (measurement). Describe comparability of assessment methods if there is more than one group – <a href="#">Page 7</a>                                                                                                                                                                                                                                                                                                                                                                                                                                                                                                                                             |
| Bias                      | 9       | Describe any efforts to address potential sources of bias – <a href="#">Pages 8–10</a>                                                                                                                                                                                                                                                                                                                                                                                                                                                                                                                                                                                                                                                                    |
| Study size                | 10      | Explain how the study size was arrived at – <a href="#">Page 8</a>                                                                                                                                                                                                                                                                                                                                                                                                                                                                                                                                                                                                                                                                                        |
| Quantitative variables    | 11      | Explain how quantitative variables were handled in the analyses. If applicable, describe which groupings were chosen and why – <a href="#">Pages 8–10</a>                                                                                                                                                                                                                                                                                                                                                                                                                                                                                                                                                                                                 |
| Statistical methods       | 12      | (a) Describe all statistical methods, including those used to control for confounding – <a href="#">Pages 8–10</a><br>(b) Describe any methods used to examine subgroups and interactions – <a href="#">Pages 8–10</a><br>(c) Explain how missing data were addressed – <a href="#">Online supplement</a><br>(d) <i>Cohort study</i> —If applicable, explain how loss to follow-up was addressed – <a href="#">N/A as this was an observational study based on validated databases that included</a>                                                                                                                                                                                                                                                      |

**patients with data for defined time points (Pages 5 and 6)**

*Case-control study*—If applicable, explain how matching of cases and controls was addressed

*Cross-sectional study*—If applicable, describe analytical methods taking account of sampling strategy

(g) Describe any sensitivity analyses – [Page 8](#)

## Results

|                          |     |                                                                                                                                                                                                                                                                                                                                                                                                                                                                                                                          |
|--------------------------|-----|--------------------------------------------------------------------------------------------------------------------------------------------------------------------------------------------------------------------------------------------------------------------------------------------------------------------------------------------------------------------------------------------------------------------------------------------------------------------------------------------------------------------------|
| Participants             | 13* | (a) Report numbers of individuals at each stage of study—eg numbers potentially eligible, examined for eligibility, confirmed eligible, included in the study, completing follow-up, and analysed – <a href="#">Page 10 and Figure 1</a><br>(b) Give reasons for non-participation at each stage – <a href="#">Page 10 and Figure 1</a><br>(c) Consider use of a flow diagram – <a href="#">Figure 1</a>                                                                                                                 |
| Descriptive data         | 14* | (a) Give characteristics of study participants (eg demographic, clinical, social) and information on exposures and potential confounders – <a href="#">Page 10, Table 1, Supplementary Table 1</a><br>(b) Indicate number of participants with missing data for each variable of interest – <a href="#">Table 1</a><br>(c) <i>Cohort study</i> —Summarise follow-up time (eg, average and total amount) – <b>A fixed outcome period of 1 year was used (Page 6)</b>                                                      |
| Outcome data             | 15* | <i>Cohort study</i> —Report numbers of outcome events or summary measures over time – <a href="#">Pages 13 and 14, Table 2</a><br><i>Case-control study</i> —Report numbers in each exposure category, or summary measures of exposure<br><i>Cross-sectional study</i> —Report numbers of outcome events or summary measures                                                                                                                                                                                             |
| Main results             | 16  | (a) Give unadjusted estimates and, if applicable, confounder-adjusted estimates and their precision (eg, 95% confidence interval). Make clear which confounders were adjusted for and why they were included – <a href="#">Pages 13 and 14, Figures 2 and 3</a><br>(b) Report category boundaries when continuous variables were categorized – <a href="#">Pages 13 and 14</a><br>(c) If relevant, consider translating estimates of relative risk into absolute risk for a meaningful time period – <a href="#">N/A</a> |
| Other analyses           | 17  | Report other analyses done—eg analyses of subgroups and interactions, and sensitivity analyses – <a href="#">Page 14</a>                                                                                                                                                                                                                                                                                                                                                                                                 |
| <b>Discussion</b>        |     |                                                                                                                                                                                                                                                                                                                                                                                                                                                                                                                          |
| Key results              | 18  | Summarise key results with reference to study objectives – <a href="#">Pages 14 and 15</a>                                                                                                                                                                                                                                                                                                                                                                                                                               |
| Limitations              | 19  | Discuss limitations of the study, taking into account sources of potential bias or imprecision. Discuss both direction and magnitude of any potential bias – <a href="#">Pages 15–17</a>                                                                                                                                                                                                                                                                                                                                 |
| Interpretation           | 20  | Give a cautious overall interpretation of results considering objectives, limitations, multiplicity of analyses, results from similar studies, and other relevant evidence – <a href="#">Page 18</a>                                                                                                                                                                                                                                                                                                                     |
| Generalisability         | 21  | Discuss the generalisability (external validity) of the study results – <a href="#">Page 18</a>                                                                                                                                                                                                                                                                                                                                                                                                                          |
| <b>Other information</b> |     |                                                                                                                                                                                                                                                                                                                                                                                                                                                                                                                          |
| Funding                  | 22  | Give the source of funding and the role of the funders for the present study and, if applicable, for the original study on which the present article is based – <a href="#">Page 19</a>                                                                                                                                                                                                                                                                                                                                  |

\*Give information separately for cases and controls in case-control studies and, if applicable, for exposed and unexposed groups in cohort and cross-sectional studies.

1  
2 **Note:** An Explanation and Elaboration article discusses each checklist item and gives methodological background and  
3 published examples of transparent reporting. The STROBE checklist is best used in conjunction with this article (freely  
4 available on the Web sites of PLoS Medicine at <http://www.plosmedicine.org/>, Annals of Internal Medicine at  
5 <http://www.annals.org/>, and Epidemiology at <http://www.epidem.com/>). Information on the STROBE Initiative is  
6 available at [www.strobe-statement.org](http://www.strobe-statement.org).  
7  
8  
9  
10  
11  
12  
13  
14  
15  
16  
17  
18  
19  
20  
21  
22  
23  
24  
25  
26  
27  
28  
29  
30  
31  
32  
33  
34  
35  
36  
37  
38  
39  
40  
41  
42  
43  
44  
45  
46  
47  
48  
49  
50  
51  
52  
53  
54  
55  
56  
57  
58  
59  
60
